1 **Exploratory behavior is associated with microhabitat and evolutionary radiation in**  
2 **Lake Malawi cichlids**

3  
4 Zachary V. Johnson<sup>†1</sup>, Emily C. Moore<sup>†2,3</sup>, Ryan Y. Wong<sup>4</sup>, John R. Godwin<sup>2</sup>, Jeffrey T.  
5 Streelman<sup>1</sup>, Reade B. Roberts<sup>2</sup>

6  
7 <sup>1</sup>School of Biological Sciences, Georgia Institute of Technology, Atlanta, GA, USA

8 <sup>2</sup>Department of Biological Sciences and W. M. Keck Center for Behavioral Biology, North  
9 Carolina State University, Raleigh, NC, USA

10 <sup>3</sup>Division of Biological Sciences, University of Montana, Missoula, MT, USA

11 <sup>4</sup>Department of Biology and Department of Psychology, University of Nebraska Omaha,  
12 Omaha, NE, USA

13

14 † Both authors contributed equally to this work

15

16 Acknowledgements: Preparation of this manuscript was supported by an Arnold and Mabel  
17 Beckman Foundation Beckman Young Investigator Award to RBR and by NIH grant  
18 R01GM101095 to JTS

19

20 Declarations of interest: none

21

22

23 Address Correspondence to:

24

25 Zachary Johnson

26 E-mail: [zachary.johnson@biosci.gatech.edu](mailto:zachary.johnson@biosci.gatech.edu)

27 Postal: 950 Atlantic Dr NW

28 Engineered Biosystems Building, 3<sup>rd</sup> floor

29 Atlanta, GA 30332

30

31 Emily Moore

32 E-mail: [emily.moore@umontana.edu](mailto:emily.moore@umontana.edu)

33 Postal: 32 Campus Drive

34 Division of Biological Sciences, HS 104

35 Missoula, MT, 59812

36

37

38

39

40

41

42 **Abstract**

43

44 Encountering and adaptively responding to unfamiliar or novel stimuli is a fundamental  
45 challenge facing animals and is linked to fitness. Behavioral responses to novel stimuli, or  
46 exploratory behavior, can differ strongly between closely related species; however, the  
47 ecological and evolutionary factors underlying these differences are not well understood, in  
48 part because most comparative investigations have focused on only two species. In this  
49 study, we investigate exploratory behavior across a total of 23 species in a previously  
50 untested vertebrate system, Lake Malawi cichlid fishes, which comprises hundreds of  
51 phenotypically diverse species that have diverged in the past one million years. We  
52 demonstrate generally conserved behavioral response patterns to novel stimuli in Lake  
53 Malawi cichlids, spanning multiple assays and paralleling other teleost and rodent lineages.  
54 Next, we demonstrate that more specific dimensions of exploratory behavior vary strongly  
55 among Lake Malawi cichlids, and that a large proportion of this variation is explained by  
56 species differences. We further show that species differences in open field behavior are  
57 associated with microhabitat and with major evolutionary radiations between mbuna and  
58 benthic/utaka lineages in Lake Malawi. Lastly, we track individuals across multiple  
59 behavioral assays and show that patterns of behavioral covariation across contexts are  
60 characteristic of modular complex traits. Taken together, our results tie ecology and  
61 evolution to natural behavioral variation, and highlight Lake Malawi cichlids as a powerful  
62 system for understanding the biological basis of exploratory behaviors.

63

64 **Keywords:** teleosts, novel stimuli, neophobia, neophilia, anxiety-like behavior, bold shy axis,  
65 stress response, habitat preference, behavioral modularity, behavioral integration

## 66 1. Introduction

67

68 Deciding how to respond to unfamiliar or novel stimuli is a fundamental aspect of animal life  
69 that has important implications for fitness. For example, how individuals respond to novel  
70 conspecifics, heterospecifics, physical environments, food resources, or objects can directly  
71 impact survival (N. J. Dingemanse, Both, Drent et al., 2004; Ferrari, McCormick, Meekan et  
72 al., 2015; Lapiedra, Schoener, Leal et al., 2018; Smith & Blumstein, 2008). Behavioral  
73 responses to novel stimuli can vary strongly between individuals, populations, and closely-  
74 related species; however, the factors underlying this behavioral variation are not well  
75 resolved.

76

77 At the interspecies level, large scale comparative studies are a promising strategy for  
78 identifying evolutionary and ecological factors contributing to variation in behavioral  
79 responses to novel stimuli (Niels J. Dingemanse, Wright, Kazem et al., 2007). For example,  
80 a comparative study across 61 species of parrots showed that microhabitat predicts species  
81 differences in behavioral responses to novel objects: species inhabiting intermediate habitats  
82 between the forest and the savannah more readily approached novel objects compared to  
83 species inhabiting more uniform savannah habitats (R. Greenberg, 2003; Greenberg &  
84 Mettke-hofmann, 2001; Claudia Mettke-Hofmann, Winkler, & Leisler, 2002). These and other  
85 data support the idea that habitat divergence is associated with variation in exploratory  
86 behaviors. However, it is unclear how well this model generalizes across species and  
87 vertebrate lineages, in part because many comparative studies of behavioral responses to  
88 novel stimuli have compared just two avian species (Garland & Adolph, 1994; Réale,  
89 Reader, Sol et al., 2007). Furthermore, different behavioral assays and testing parameters  
90 have been used across these studies, making it difficult to identify common factors that  
91 explain species differences in behavior. To better elucidate relationships between ecological  
92 factors, such as microhabitat, and species differences in exploratory behavior, larger  
93 comparative studies in new vertebrate systems are needed.

94

95 Lake Malawi cichlid fishes are well-suited for comparative investigations of phenotypic  
96 variation, and have attracted the attention of evolutionary biologists for more than a century  
97 (R. C. Albertson, Markert, Danley et al., 1999; Johnson & Young, 2018; Rupp & Hulseay,  
98 2014; Ryan A. York & Fernald, 2017). These fishes have recently (within the past one million  
99 years) undergone explosive speciation, diversifying through multiple major evolutionary  
100 radiations into an estimated 500-1000 species that vary in morphology, coloration, diet,  
101 habitat preference, and behavior (Brawand, Wagner, Li et al., 2014; Kocher, 2004; Malinsky,  
102 Svardal, Tyers et al., 2018). Within Lake Malawi, ecological conditions vary across small  
103 spatial scales, resulting in diverse species occupying different microhabitats while living in  
104 close geographic proximity. For example, although many species can be grouped into two  
105 canonical ecotypes, rock-dwelling and sand-dwelling (Kocher, 2004), a large number of  
106 species occupy the intermediate habitat, or the interface between rocky and sandy  
107 substrate. Thus, the Lake Malawi species assemblage is an excellent system for studying  
108 relationships between evolution, ecology, and phenotypic variation.

109

110 Comparative studies in Lake Malawi cichlids have already generated insights into the  
111 evolution of complex traits. Species differences in morphology, color patterning, sex  
112 determination, and bower building behavior have been mapped to specific genomic loci (R.  
113 Craig Albertson, Streelman, & Kocher, 2003; Bloomquist, Parnell, Phillips et al., 2015;  
114 Conith, Hu, Conith et al., 2018; Kratochwil, Liang, Gerwin et al., 2018; Roberts, Ser, &  
115 Kocher, 2009; Ser, Roberts, & Kocher, 2010; R. A. York, Patil, Abdilleh et al., 2018).  
116 Ecological factors have also been linked to phenotypic variation, including species  
117 differences in jaw morphology and behaviors such as aggression and bower-building (R.  
118 Craig Albertson, 2008; Danley, 2011; Ryan A. York, Patil, Hulseay et al., 2015). Several  
119 studies have also demonstrated modular patterns of phenotypic variation in Malawi cichlids  
120 (R. Craig Albertson, Powder, Hu et al., 2014; Parsons, Cooper, & Albertson, 2011). Briefly,  
121 evolutionary modularity and integration refer to patterns of covariance within a set of traits  
122 across divergent populations and/or species (e.g. patterns of covariance among the lengths  
123 of different oral jaw bones across species), and they are thought to be related to trait  
124 evolvability (Raff & Raff, 2000; Wagner, Pavlicev, & Cheverud, 2007). Integration refers to

125 more uniform patterns of covariation, while modularity refers to non-uniform patterns of  
126 covariation and is generally considered to reflect enhanced trait evolvability; however,  
127 integration does not necessarily suggest a constraint on evolvability, and patterns of  
128 covariation by themselves are not sufficient for proving lesser or greater evolutionary  
129 potential (Armbruster, Pélabon, Bolstad et al., 2014).

130

131 Although the Lake Malawi species assemblage is an excellent system for comparative  
132 investigation, few comparative behavioral studies have been conducted in this system. We  
133 aim to address this gap by investigating exploratory behavior using four classic behavioral  
134 assays (Stewart, Cachat, Wong et al., 2011; Stewart, Gaikwad, Kyzar et al., 2012) across a  
135 total of 23 species, which collectively span three Lake Malawi microhabitats: rock, sand, and  
136 rock/sand intermediate. We test the following hypotheses: (i) Malawi cichlids exhibit  
137 responses to novel stimuli that are similar to other teleosts and other vertebrates; (ii) natural  
138 evolution has resulted in a high degree of phenotypic variance in exploratory behaviors  
139 among Lake Malawi cichlids; (iii) variation in exploratory behaviors is explained by  
140 divergence between species; (iv) species differences in exploratory behaviors are  
141 associated with microhabitat and major evolutionary radiations in Malawi cichlids; and (v) like  
142 other complex traits in this species assemblage, exploratory behaviors are modular.

143

## 144 **2. Methods**

145

### 146 **2.1 Subjects**

147

148 Subjects were maintained at two institutions, Georgia Institute of Technology (INSTITUTION  
149 1) in Atlanta, GA and North Carolina State University (INSTITUTION 2) in Raleigh, NC. Both  
150 institutions house laboratory cichlid lines derived from wild-caught animals collected in Lake  
151 Malawi. Similar housing and husbandry conditions were maintained at both institutions: (i)  
152 age- and size-matched individuals were socially housed in mixed-sex tanks at similar  
153 densities (ranging between 0.67-1.33 cm of fish/liter) and co-cultured as necessary to reduce  
154 aggression; (ii) room temperature ranged from 26.5-28.0°C and humidity was maintained at

155 approximately 40%; (iii) tank water temperature ranged between 27-28°C, pH between 7.8-  
156 8.2, and conductivity between 230-260 uS; and (iv) 12:12 hour light:dark cycles were  
157 maintained with transitional dim light periods.

158

159 INSTITUTION 1 animals were maintained in the Engineered Biosystems Building cichlid  
160 aquaculture facilities at INSTITUTION 1 in accordance with the Institutional Animal Care and  
161 Use Committee (IACUC) guidelines (protocol numbers A100028 and A100029). Subjects  
162 were housed on a 12:12-hour light:dark cycle with full lights on between 8am-6pm Eastern  
163 Standard Time (EST) and dim lights on for 60 minutes between the light-dark transition  
164 (7am-8am and 6pm-7pm EST). All subjects were housed in 190-liter or 95-liter glass tanks  
165 measuring 92 cm (long) x 46 cm (wide) x 42 cm (high) or 46 cm (long) x 46 cm (wide) x 42  
166 cm (high), respectively, and fed daily (Spirulina Flake; Aquatic Ecosystems). Male and  
167 female subadults (age 90-180 days) were analyzed in the novel tank test and light-dark test  
168 (described below), and male and female reproductive adults (>180 days) were tested in the  
169 open field test (described below).

170

171 INSTITUTION 2 animals were maintained in the INSTITUTION 2 Roberts Lab cichlid  
172 aquaculture facility in Raleigh, NC. Subjects were housed on a 12:12-hour light:dark cycle  
173 with dim lights on for 15 minutes during the light-dark transition periods, and were fed daily  
174 (Best Flake 70% Vegetable/30% Brine mix; Worldwide Aquatics). All experiments were  
175 conducted under the approval of the Institutional Animal Care and Use Committee (IACUC)  
176 guidelines (protocol number 14-138-O). For all thirteen INSTITUTION 2 species tested in the  
177 open field test, subjects were housed in 189-liter or 473-liter tanks measuring 92 cm (long) x  
178 47 cm (wide) x 48 cm (high) or 184 cm (long) x 47 cm (wide) x 60 cm (high), respectively,  
179 and were tested as male and female reproductive adults (>180 days). For all five  
180 INSTITUTION 2 species tested in the novel object test, subjects were socially housed in  
181 mixed-species groups in a single 473-liter aquarium and were tested as male and female  
182 reproductive adults (>180 days).

183

184 2.2 Animal welfare

185

186 At both institutions, the utmost care was taken to minimize stress from handling and housing,  
187 both in general husbandry and during behavioral experiments. Non-experimental fish were  
188 communally housed to provide social interaction, and monitored carefully to ensure that  
189 animals had access to territories and were not the target of aggression. Monitoring allowed  
190 for intermittent reorganization of co-housed fish if needed. During behavioral experiments,  
191 fish were gently netted out of their home tanks by an experienced handler and carefully  
192 moved to reduce stress as much as possible. Transfer containers were covered by nets to  
193 reduce stress, as well. For the subset of tests at INSTITUTION 2 that required isolation in  
194 aquaria to allow the focal fish to establish ownership of territory, visual contact was  
195 maintained with surrounding tanks providing opportunity for social interaction. To prevent  
196 influence of neighbor species on behavior, a blocked design was used such that each  
197 species had an equal number of times with neighbors of every other species—a step  
198 necessary to reduce stress from social isolation.

199

## 200 2.3 Behavioral assays

201

202 A total of 525 subjects spanning 23 Lake Malawi cichlid species were tested in one or more  
203 assays that are well-established and designed to measure exploratory behaviors in teleosts.  
204 Pilot data indicated strong effects of species but no effects of sex on exploratory behavior  
205 across multiple assays. Based on these data, subjects for the present study were sampled  
206 randomly from mixed sex tanks but were not euthanized and dissected to determine gonadal  
207 sex, with the exception that visually identified dominant males were sampled at a proportion  
208 consistent with the composition of the home tank, and maternal mouthbrooding females  
209 were not sampled. All assays were performed between 10:00 and 16:00 Eastern Standard  
210 Time EST. Each assay is described in detail by institution (INSTITUTION 1 and  
211 INSTITUTION 2), species, sample size, and experimental design in the following sections.

212

### 213 *Assays by test site*

214

215 The novel tank and light-dark tests were conducted at INSTITUTION 1 only. 110 subjects  
216 from eight species were tested in the novel tank test; 67 of these subjects were also tested  
217 in the light-dark test, and four additional subjects were tested exclusively in the light-dark test  
218 (see Supplementary Tables 1, 2, and 5 for sample sizes by species). The novel object test  
219 was conducted at INSTITUTION 2 only, and 70 subjects from five species were tested.  
220 Motivated by convergent patterns found independently at both institutions, the open field test  
221 was then conducted across a larger species and subject pool spanning both INSTITUTION 1  
222 and INSTITUTION 2. For the open field test, 341 subjects from 19 species were tested: 227  
223 subjects from 13 species at INSTITUTION 2, and 113 subjects from seven species at  
224 INSTITUTION 1, with one species (*Labeotropheus fuelleborni*) tested at both institutions  
225 (See Supplementary Table 3 for sample sizes by species).

226

227 To assess phenotypic integration versus modularity of exploratory behaviors, correlated  
228 behaviors across novel contexts were measured by applying Modularity Modular Clustering  
229 analysis (MMC; described below) to three independent datasets in which subjects were  
230 tracked across multiple assays. The first dataset included 67 subjects from eight Malawi  
231 cichlid species that were tested in both the novel tank test and light-dark test at  
232 INSTITUTION 1 (Supplementary Table 4). The second dataset included 70 subjects from  
233 five Malawi cichlid species that were tested in the novel object test, open field test, and  
234 resident intruder test at INSTITUTION 2 (Supplementary Table 4). As a control, a third  
235 dataset was re-analyzed from a previously published study in selectively bred high- and low-  
236 exploratory strains of wild-derived zebrafish. In this study, 99 subjects from three selection  
237 lines were tested across a battery of behavioral assays (Wong, Perrin, Oxendine et al.,  
238 2012).

239

#### 240 *Novel tank test*

241

242 The novel tank test is a classic assay designed to measure exploration of a tall and narrow  
243 transparent tank, with primary focus on exploration of the upper half (Fig. 1A-B). Individual  
244 subadult subjects (90-180 days; 1.75-2.5 cm standard length, SL) spanning eight species



245 were collected between 11:00-15:00 Eastern Standard Time from their home tank,  
246 transferred to a 300 mL holding beaker, and habituated for 30 minutes prior to behavioral  
247 testing. Water for both habituation beakers and test tanks was collected from a circulating  
248 aquaculture system supplying all home tanks, ensuring that water was consistent across the  
249 home tank, transfer, habituation, and testing environments. Following habituation, subjects  
250 were introduced to a plastic 1.8-L novel tank (Aquaneering; 29.7 cm long x 7.5 cm wide 15.2  
251 cm high) and were side-view video recorded for 6 minutes using a GoPro Hero4 camera.  
252 Species composition was counterbalanced across trials to control for potential effects of  
253 testing round. EthoVision (Noldus) software was used to analyze time spent in the top half,  
254 entries/exits to and from the top half, latency to enter top half, and average distance from the  
255 bottom and corners, and total distance traveled.

256

#### 257 *Light-dark test*

258

259 In the light-dark test, subjects can freely move between an opaque black chamber and a  
260 backlit semi-opaque white chamber (Fig 1C-D). As in rodents, this assay is designed to  
261 investigate place preferences between a dark versus illuminated environment, and  
262 exploration of the illuminated environment. Individual subadult subjects (90-180 days; 4-6.5  
263 cm length) from all eight tested species were transferred to a 300 mL beaker of water and  
264 habituated for 30 minutes prior to testing. All water was collected from the same circulating  
265 aquaculture system (described above). Following habituation, subjects were first introduced  
266 to a 6.5 cm x 7.5 cm habituation chamber (half white, half black) within the larger custom  
267 built acrylic light-dark tank (half white, half black; 24 cm long x 6.5 cm wide x 16.5 cm high).  
268 Individual subjects habituated for 5 minutes in the central habituation chamber, at which  
269 point two inserts were simultaneously removed, allowing subjects to swim freely throughout  
270 the entirety of the light-dark tank. Species were counterbalanced across trials. All subjects  
271 were top-down video recorded for 6 minutes using a GoPro Hero4 camera. EthoVision  
272 (Noldus) software was used to analyze time spent in the light versus dark halves, as well as  
273 latency to enter, number of entries, total time spent, and total distance traveled in the light  
274 half.

275

276 *Novel object test*

277

278 The novel object test has been employed across a wide range of vertebrate species and is  
279 designed to test behavioral responses (e.g. patterns of approach and retreat) toward an  
280 unfamiliar object (Fig 1E-F). Subjects were introduced to a 38-liter (50 cm x 28 cm x 33 cm)  
281 aquarium containing a single terracotta flowerpot territory and acclimated for three days. To  
282 assess activity and motivation during the acclimation period, latency to feed was measured  
283 at each meal. All subjects ate within 60 seconds of feeding by the final day of acclimation.  
284 Following the acclimation period, a camera was placed overhead, and water and air flow  
285 was stopped five minutes prior to the beginning of the test to enable clear video recording  
286 and to allow time for subjects to habituate to the change. A snail shell from Lake Malawi was  
287 then introduced into the home aquarium and behavior was recorded for 30 minutes with a  
288 digital video camera. The position of the most rostral aspect of the head was scored with  
289 Manual Tracking plug-in (Cordeliers 2005) for ImageJ (Schneider et al. 2012) in 0.2 second  
290 intervals (5 frames per second). Aquarium positioning prevented the entire arena from being  
291 filmed, so position analysis was restricted to the front-most 25.4 cm x 26 cm of the tank for  
292 all subjects. For the novel object test, total time spent stationary, approaching, and retreating  
293 from the object; distance from the object; and approach velocity, retreat velocity, average  
294 velocity, and change in velocity over the course of the assay were analyzed.

295

296 *Open field test*

297

298 The open field test for teleosts is similar in design to the open field test used in mice and  
299 other rodents, in which subjects are allowed to move freely throughout a large open arena.  
300 For teleosts, vertical motion is restricted by shallow water depth, and the test is thus  
301 designed to measure behavioral responses to a large and open shallow water environment  
302 (Fig 1G-H). For the present study, 19 species were analyzed in the open field test at two test  
303 sites (INSTITUTION 1 and INSTITUTION 2). MMC (described below) also included re-  
304 analysis of a separate open field (and resident intruder) dataset collected as part of a

305 different study (Moore & Roberts, *in preparation*) from five species under different  
306 parameters (described below) at INSTITUTION 2 (see Supplementary Table 4).

307

308 All subjects were gently netted from their home tank and placed in the center of a white,  
309 opaque container filled with aquaculture system water at shallow depths to restrict vertical  
310 movement. At both institutions, larger subjects exceeding 4.5 cm standard length (SL) were  
311 introduced to a 49.6 cm-wide square arena filled to a depth of 15 cm, while smaller subjects  
312 ranging from 2.5-4.5 cm SL were introduced to a 25.5 cm-wide square arena filled to a depth  
313 of 10 cm.

314

315 For all open field trials, tank water was replaced between every subject. Video recordings  
316 were taken for 5.5 minutes from an overhead position. The first 10 seconds of the video files  
317 were trimmed (Quicktime Player 7) to remove footage of fish placement, and processed at  
318 10 frames per second (fps) using C-trax 0.5.4 (Branson et al. 2009) to generate XY  
319 coordinates of fish position in arena. Custom scripts were used to generate position and  
320 speed in the arena (R v3.3.1). For place analysis, the arena was divided into a grid of 16  
321 squares, with the outer ring of squares forming the “peripheral” regions, the central four  
322 squares forming the “center” region, and the four corner squares forming the “corner”  
323 regions.

324

325 2.4 Designations of microhabitat, evolutionary radiation, and genus

326

327 Previous genomic analyses suggest that Lake Malawi cichlids have diversified through  
328 multiple major evolutionary radiations of (i) pelagic species, (ii) shallow/deep benthic and  
329 “utaka” species, and (iii) “mbuna” species (Malinsky, Svardal, Tyers et al., 2018). The  
330 species sampled in the present study represented the latter two radiations (shallow/deep  
331 benthic and utaka, B/U; and mbuna). These radiations are well-characterized, and  
332 designations for evolutionary radiation as well as genus were made according to Konings  
333 (Konings, 2007). Microhabitat designations (rock, sand, or intermediate) for each species

334 were made according to Ribbink et al. and Konings (Konings, 2007; Ribbink, Marsh, Marsh  
335 et al., 1983).

336

337 2.5 Statistics

338

339 All statistics analyses were performed in R (R v3.3.1 and R v3.4) unless otherwise specified.

340

341 *Place bias in novel environment assays*

342

343 To measure general place biases between zones in the novel tank and light-dark tests  
344 across species, a linear regression model with time spent as the outcome variable, and zone  
345 (e.g. top vs. bottom) and species as categorical predictor variables, was fit to the data.

346

347 ***Time spent in zone ~ zone + species***

348

349 Because the open field test was performed at two test sites using two arena sizes, these  
350 factors were added to the model as categorical variables, and time spent in central versus  
351 peripheral regions were analyzed:

352

353 ***Time spent in zone ~ zone + species + test site + arena size***

354

355 Within each species, paired t-tests were used to test the significance of differences in time  
356 spent in different zones.

357

358 *Species differences in exploratory behavior*

359

360 When appropriate, one-way ANOVA was used to test for species differences in behaviors.  
361 Effect size (Eta-squared) was calculated by dividing the individual effects' sum of squares by  
362 the total sum of squares. For some of the measurements taken, there were unequal  
363 variances between species. Because unequal variance between groups violates the  
364 assumptions of one-way ANOVA, non-parametric tests were used in these cases, including

365 the one-way ANOVA equivalent Wilcoxon/Kruskal-Wallis test and the Wilcoxon Product-Limit  
366 survival fit for latency measures. To be considered to have unequal variances, at least one  
367 of O'Brien, Brown-Forsythe, or Levene's tests of unequal variance had to be significant at  
368 the  $p=0.05$  level. Pairwise contrasts were performed with Tukey-Kramer honest significant  
369 difference test (HSD) for measurements with equal variance between groups, and Wilcoxon  
370 multiple comparisons was conducted for those requiring non-parametric analysis. To  
371 examine behavioral responses to a novel object over time, we used a MANOVA repeated  
372 measures, where time points within individuals were analyzed at one level, and differences  
373 between species were analyzed as an additional level, with a species\*time interaction term.  
374 Since Mauchly's Test of Sphericity indicated violations to the sphericity assumption  
375 (criterion=0.346;  $\text{Chi}^2=67.95$ ;  $\text{df}=14$ ,  $p=4.53 \times 10^{-9}$ ) we used the Huynh-Feldt correction to  
376 adjust for unequal covariances between groups.

377

#### 378 *Effects of microhabitat and radiation on exploratory behavior*

379

380 Associations between microhabitat and behavior were assessed through linear mixed effects  
381 models using the "lme4" package in R. Each behavior of interest was designated as the  
382 outcome variable, microhabitat and evolutionary radiation (mbuna vs. B/U) as fixed effects,  
383 species nested within genus as a random effect, and both arena size and lab as random  
384 effects. In this model microhabitat and evolutionary radiation directly competed to explain  
385 variance in exploratory behavior, controlling for variance explained by other phylogenetic  
386 factors and batch-like effects such as arena size and test site. This model was used to test  
387 six open field behavioral metrics, including time spent in the corners, entries into the corners,  
388 time spent in the center, entries into the center, total distance traveled, and change in speed  
389 over time. The model was organized as follows, (with bold italicized terms representing fixed  
390 effects, and non-bold italicized terms representing random effects, with nested terms in  
391 parentheses):

392

393 **OF behavior** ~ *microhabitat + radiation* + (*genus/species*) + *test site + arena size*

394

395 Because the mbuna radiation tends to inhabit rock microhabitats, and the B/U radiation  
396 tends to inhabit sand microhabitats, the fixed effects (radiation and microhabitat) in the  
397 above model were correlated, potentially masking additional relationships between  
398 microhabitat, evolutionary radiation, and exploratory behaviors. To further disentangle the  
399 relationships between the intermediate microhabitat, evolutionary radiation, and exploratory  
400 behavior, we applied a second model in which the original microhabitat term (rock, sand, or  
401 intermediate) was simplified into an intermediate (versus non-intermediate) term. This model  
402 thus tested how divergence into the intermediate microhabitat was associated with  
403 exploratory behaviors. To account for the possibility that divergence into the intermediate  
404 habitat is differentially related to exploratory behaviors in the mbuna versus B/U radiations,  
405 we also included an intermediate\*radiation interaction term:

406

407 **OF behavior ~ intermediate + radiation + intermediate\*radiation + (genus/species) + test site + arena size**

408

409 To test whether mbuna rock-dwellers and B/U sand-dwellers exhibited differences in novel  
410 tank behavior, a simpler model was used (all species came from a unique genus, and all  
411 subjects were tested in identical tanks at the same test site). Notably, because all  
412 INSTITUTION 1 mbuna species tested inhabited rock habitats, and all INSTITUTION 1 B/U  
413 species tested inhabited sand habitats, “radiation” and “microhabitat” could be interchanged  
414 in the model with identical results:

415

416 **NT behavior ~ radiation + species**

417

418 For all linear mixed effects models, estimates for fixed effects were calculated by maximum  
419 likelihood estimation using the ‘lme4’ package in R, and significance for fixed effects was  
420 calculated using Satterthwaite approximation through the ‘lmerTest’ package and the anova  
421 function in R. Estimates of pairwise differences between levels for each fixed effect were  
422 calculated using estimated marginal means (least squared means), and the significance of  
423 these differences were determined using Satterthwaite approximation corrected for multiple  
424 comparison families with Tukey’s adjustment, using the ‘emmeans’ and ‘multcomp’  
425 packages in R

426

427 To analyze movement in the open field test over time, the numbers of slow or stopped  
428 instances were summed over each minute, and one minute bins were used as the input for a  
429 repeated measures MANOVA. Time points within individuals were analyzed at one level,  
430 differences between microhabitat were analyzed at an additional level, microhabitat\*time  
431 was included as an interaction term, and additional terms were included to control for test  
432 site and arena size. The overall change in velocity (average velocity in minute 1 – average  
433 velocity in minute 5) throughout the assay was analyzed with an ANOVA by microhabitat (a  
434 positive value indicates that the subject swam faster at the start of the assay, and a negative  
435 value indicates the subject swam faster at the end of the assay).

436

#### 437 *Effects of Test Site*

438

439 To assess the extent to which test site may have influenced open field behavior and/or  
440 downstream analyses, we analyzed its effect on behavior for the only species that was  
441 housed and tested at both sites, *Labeotropheus fuelleborni* (INSTITUTION 1, n=16;  
442 INSTITUTION 2, n=7). Controlling for arena size, linear regression showed that test site was  
443 not significantly associated or trending with any of the six analyzed open field behaviors:  
444 corner time (t=1.33, p=0.20), corner entries/exits (t=0.15, p=0.88), center time (t=0.56,  
445 p=0.58), center entries/exits (t=0.86, p=0.39), distance traveled (t=0.54, p=0.60), and speed  
446 change (t=1.56, p=0.14). We also conducted all open field analyses with and without test site  
447 included in the above linear mixed effects models, and found that the vast majority (11/14) of  
448 significant or trending relationships were also significant or trending when test site was  
449 excluded. The few results that changed from statistically significant to p>0.10, as well as all  
450 results that were significant or trending in both models, are indicated in Tables 1 and 2.

451

#### 452 *Behavioral modularity test*

453

454 To examine behavioral correlations within and across assays, we performed Modulated  
455 Modularity Clustering (MMC) analysis (Stone & Ayroles, 2009). This test identifies clusters of

456 covariance in multivariate data. Although this method was developed to analyze gene  
457 expression data, it is effective for any large, multivariate datasets where many phenotypes  
458 have been measured across a large sample of subjects. To demonstrate as a proof-of-  
459 principle that MMC analysis can reveal behavioral correlations across these assays, we re-  
460 analyzed a previously published zebrafish dataset in which individuals from selectively bred  
461 high- and low-exploratory strains were tracked across multiple assays and behavioral  
462 correlations across assays were identified (Wong, Perrin, Oxendine et al., 2012). We then  
463 separately performed MMC on two independent Lake Malawi cichlid datasets: an  
464 INSTITUTION 1 dataset in which individuals were tracked across the novel tank and light-  
465 dark tests (Supplementary Table 4), and an INSTITUTION 2 dataset to analyze behavioral  
466 modules across the open field, novel object, and resident-intruder tests (Supplementary  
467 Table 4). In all MMC analyses, each individual behavioral metric within each assay (such as  
468 speed, position, time spent in a specific zone, etc.) was included in the analysis. Since these  
469 assays are of different measurement types, Spearman rank-order correlation was used in  
470 place of Pearson's correlation.

471

### 472 **3. Results**

473

#### 474 **3.1 Malawi cichlids exhibit consistent place biases across assays**

475

476 The three novel environment assays used in this study have been used widely in teleosts,  
477 particularly in zebrafish, and variations of these tests are well-established in rodents. We first  
478 investigated how Lake Malawi cichlids respond to these novel environments by measuring  
479 their place biases between different zones (e.g. light half versus dark half). In general, Lake  
480 Malawi cichlids exhibited strong place biases for specific zones in all three novel  
481 environment assays, spending more time in the bottom half of the novel tank test, the dark  
482 half of the light-dark test, and the periphery of the open field test. The direction of the place  
483 biases were the same in all species tested, and were consistent with other teleosts and  
484 rodents. More detailed results are organized by assay below:

485



486 *Malawi cichlids prefer the bottom region in the novel tank test*

487

488 Linear regression controlling for species revealed that Malawi cichlids generally expressed a  
489 strong place preference for the bottom half in the novel tank test ( $n=110$ ;  $t=20.982$ ;  
490  $p<0.0001$ ), spending an average of  $307.5\pm 6.1$  seconds in the bottom half compared to  
491  $52.5\pm 6.1$  seconds in the top half. The direction of the preference was consistent across all  
492 species tested, and two-tailed paired t-tests showed that this preference was significant  
493 within each species ( $p<0.05$  for all species tested, Supplementary Table 1). Notably, *post-*  
494 *hoc* Tukey's HSD tests showed significant differences in the strength of the bias between  
495 *Mchenga conophoros*, a B/U sand-dwelling species, and all other species tested, with  
496 *Mchenga conophoros* spending significantly more time in the top half (Supplementary Figure  
497 1A). More detailed results by species are shown in Supplementary Table 1.

498

499 *Malawi cichlids prefer the dark region in the light-dark test*

500

501 Malawi cichlids exhibited a strong place bias in the light-dark test ( $n=77$ ;  $t=16.07$ ;  $p<0.0001$ ),  
502 spending more time in the dark half (an average of  $283.2\pm 8.9$  seconds in the dark half  
503 versus  $76.8\pm 8.9$  seconds in the light half). Detailed results are presented by species in  
504 Supplementary Table 2. Notably, one B/U sand-dwelling species, *Copadichromis virginalis*,  
505 did not exhibit a significant place bias between the light and dark zones ( $n=12$ ; two-tailed  
506 paired t-test,  $p=0.46$ ; Supplementary Table 2), and this differed significantly from several  
507 other species (Supplementary Figure 1B). Additional results are presented by species in  
508 Supplementary Table 2.

509

510 *Malawi cichlids prefer peripheral regions in the open field test*

511

512 Malawi cichlids spent more time in the peripheral regions of the open field test compared to  
513 the center region. Linear regression controlling for species, test site, and arena size showed  
514 a strong place bias between the central versus peripheral regions ( $n=340$ ;  $t=89.24$ ;  
515  $p<0.0001$ ); spending an average of  $298.9\pm 2.2$  seconds in the periphery compared to

516 21.1±2.2 seconds in the center. Two-tailed paired t-tests revealed these differences to be  
517 significant in every species tested ( $p < 0.05$  for all species tested, Supplementary Table 3).  
518 Additional results are presented by species in Supplementary Table 3. Notably, the B/U  
519 intermediate species *Aulonocara baenschi* and the mbuna rock-dweller *Metriaclima mbenjii*  
520 spent significantly less time in corner regions compared to multiple other species  
521 (Supplementary Figure 1C).

522

523 3.2 Malawi cichlids exhibit a high degree of phenotypic variance in exploratory behaviors

524

525 We next investigated the degree of phenotypic variance in exploratory behaviors that has  
526 resulted from natural evolution in Lake Malawi. For a frame of reference, we compared  
527 phenotypic variance in exploratory behaviors among Lake Malawi cichlids and among three  
528 strains of zebrafish: two wild-derived strains that have been selectively bred for divergent  
529 exploratory behaviors and a common domesticated wild-type strain (AB). Notably, genetic  
530 divergence between common strains of zebrafish is greater than between Malawi cichlid  
531 species (Loh, Katz, Mims et al., 2008). For this analysis, we compared phenotypic variance  
532 in novel tank behaviors, because the test parameters used in the present study were the  
533 same as those used in the zebrafish study. For time spent in the top half, Malawi cichlids  
534 collectively exhibited greater phenotypic variance compared to the high- and low-exploratory  
535 zebrafish strains ( $n=110$  Malawi cichlid individuals from eight species,  $n=99$  zebrafish from  
536 three selection lines; variance for cichlids = 134.6 versus variance for zebrafish = 72.7; F-  
537 test,  $p=0.006$ ). This pattern was also true for latency to enter the top (variance for cichlids =  
538 19,941 versus variance for zebrafish = 10,653; F-test,  $p=0.004$ ), but not for frequency of  
539 entries into the top half (variance for zebrafish = 15.56 vs. variance for cichlids = 15.59; F-  
540 test,  $p=0.996$ ). Phenotypic variance in the novel tank test is represented in Figure 1A-B.

541

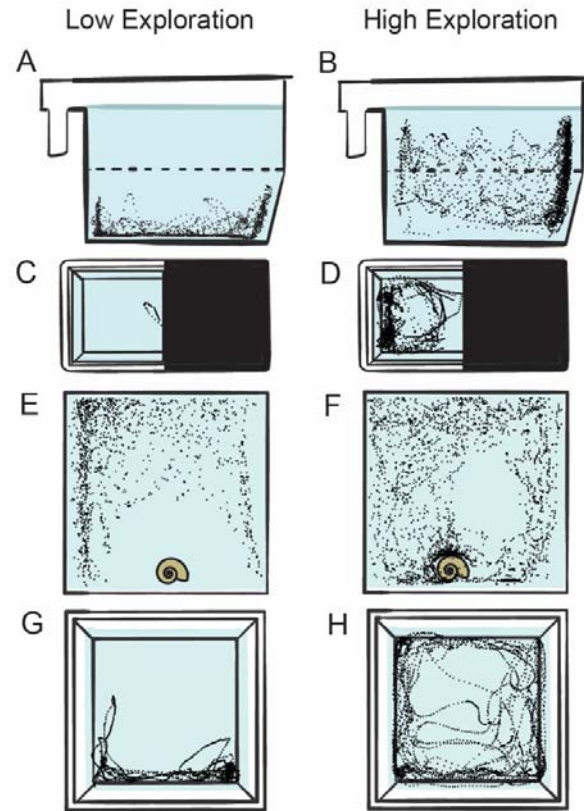

542

543 **Figure 1. Lake Malawi cichlids exhibit high phenotypic variation in exploratory**  
544 **behaviors.** Behavioral variation illustrated by representative traces from the four behavioral  
545 assays used in this study, the novel tank test (A-B), light-dark test (C-D), novel object test  
546 (E-F), and open field test (G-H). Individual points illustrate the position of the subject in the  
547 arena at a single timepoint. A high degree of phenotypic variance was observed across  
548 assays, ranging from stereotypically low exploratory phenotypes (A,C,E,G) to high  
549 exploratory phenotypes (B,D,F,H). For each assay, the schematic reflects the camera angle  
550 from which video recordings were collected for each trial.

551

552 3.3 Malawi cichlids exhibit strong species differences in exploratory behaviors

553

554 We next investigated the degree to which phenotypic variance in exploratory behaviors (e.g.  
555 see Figure 1) is explained by divergence along species lines. Across all four behavioral  
556 assays, nearly every dimension of exploratory behavior measured differed strongly among  
557 species. More detailed results are organized by assay below:

558

559 *Novel tank test*

560

561 In the novel tank test (Fig. 1A-B), several standard metrics of exploratory behavior were  
562 analyzed: total time spent in the top half, latency to enter the top half, total number of entries  
563 into the top half, and total distance traveled. In addition to these metrics, we also analyzed  
564 the average distance from the tank bottom, and the average distance from the tank corners.  
565 One-way ANOVAs revealed strong effects of species on total time spent in the top half  
566 ( $F_{7,102}=8.64$ ;  $p=2.74 \times 10^{-8}$ ; Eta-squared=0.37, Fig. 2A), latency to enter the top half  
567 ( $F_{7,102}=5.44$ ;  $p=2.50 \times 10^{-5}$ ; Eta-squared=0.27), total number of entries into the top half  
568 ( $F_{7,102}=8.56$ ;  $p=3.21 \times 10^{-8}$ ; Eta-squared=0.37), total distance traveled ( $F_{7,102}=8.30$ ;  $p=5.38 \times 10^{-8}$ ;  
569 Eta-squared=0.36), average distance from the tank bottom ( $F_{7,102}=12.48$ ;  $p=1.86 \times 10^{-11}$ ;  
570 Eta-squared=0.46), and average distance from the tank corners ( $F_{7,102}=8.21$ ;  $p=6.49 \times 10^{-8}$ ;  
571 Eta-squared=0.36). Pairwise differences between species are shown in Supplementary  
572 Figures 1A and 2A-D. Notably, the B/U sand-dweller *Mchenga conophoros* differed strongly  
573 from multiple other species in every dimension of behavior analyzed in this test, in every  
574 case exhibiting “more exploratory” phenotypes.

575

#### 576 *Light-dark test*

577

578 For the light-dark test (Fig 1C-D), total time spent in the light half (Fig 2B), latency to enter  
579 the light half, total number of entries into the light half, and total distance traveled in the light  
580 half were analyzed. One-way ANOVAs revealed a significant effect of species on total time  
581 spent in the light half ( $F_{7,63}=4.95$ ;  $p=1.67 \times 10^{-4}$ ; Eta-squared=0.35, Fig 2B), latency to enter  
582 the light half ( $F_{7,63}=4.42$ ;  $p=4.75 \times 10^{-4}$ ; Eta-squared=0.33), total number of entries into the  
583 light half ( $F_{7,63}=2.54$ ;  $p=0.023$ ; Eta-squared=0.22), and total distance traveled in the light half  
584 ( $F_{7,63}=2.87$ ;  $p=0.012$ ; Eta-squared=0.24). Pairwise differences between species are shown in  
585 Supplementary Figures 1B and 2E-G. Notably, the mbuna rock-dweller *Cynotilapia*  
586 *zebroides* ‘Cobue’ exhibited the longest latencies to enter the light half of any species,  
587 differing significantly from several other species (Supplementary Figure 2F).

588

#### 589 *Novel object test*

590

591 In the novel object test (Fig. 1E-F) there were strong species differences in time spent  
592 approaching the object (Wilcoxon/Kruskal-Wallis:  $\chi^2=14.04$ ,  $df=4$ ,  $p=0.0072$ ), swimming  
593 away from the object, (Wilcoxon/Kruskal-Wallis:  $\chi^2=15.06$ ,  $df=4$ ,  $p=0.0046$ ), and remaining  
594 stationary (Wilcoxon/Kruskal-Wallis:  $\chi^2=10.92$ ,  $df=4$ ,  $p=0.0275$ ). Time spent approaching and  
595 retreating were strongly correlated with each other (Pearson's  $r = 0.976$ ), but stationary, or  
596 'freezing,' responses were only partially correlated with approach patterns (Pearson's  $r$ ,  
597 approach = 0.662; retreat = 0.648). Species also differed in swimming velocity throughout  
598 the test; approach velocity (ANOVA Adj.  $R^2= 0.227712$ ,  $F_{(4, 70)} = 6.1599$ ,  $p=0.0003$ ), retreat  
599 velocity (Wilcoxon/Kruskal-Wallis test,  $\chi^2=27.49$ ,  $p<0.0001$ ), and overall average velocity  
600 (Wilcoxon/Kruskal-Wallis test,  $\chi^2=22.54$ ,  $p=0.0002$ , Fig 2C, top panel) all differed strongly by  
601 species. Notably, the *Metriaclima* spp. were faster when retreating from the shell than when  
602 approaching it, whereas *Auloncara baenschi* approached and retreated with the same speed  
603 (Wilcoxon/Kruskal-Wallis test,  $\chi^2=20.42$ ,  $p=0.0004$ , Fig 2C, bottom panel). Pairwise species  
604 differences are shown in Supplementary Figure 2H-J.

605

#### 606 *Open field test*

607

608 In the open field test (Fig. 1G-H), time spent in corner regions, corner entries/exits, time  
609 spent in the center, center entries/exits, total distance traveled, and speed change over time  
610 were analyzed. Because this assay was conducted using two different square arena sizes at  
611 two different test locations, the data was analyzed using a one-way ANOVA including an  
612 error term with arena size nested within test site. These analyses revealed strong species  
613 differences in time spent in the corner regions ( $F_{18,319}=8.928$ ;  $p<2.00\times 10^{-16}$ ; Eta-  
614 squared=0.33, Fig. 2D top panel), corner entries/exits ( $F_{18,319}=8.901$ ,  $p<2\times 10^{-16}$ , Eta-  
615 squared=0.33), time spent in the center region ( $F_{18,319}=4.77$ ;  $p=2.00\times 10^{-9}$ ; Eta-squared=0.21,  
616 Fig. 2D bottom panel), center entries/exits ( $F_{18,319}=8.57$ ;  $p<2\times 10^{-16}$ ; Eta-squared=0.33), total  
617 distance traveled ( $F_{18,319}=6.03$ ;  $p=1.34\times 10^{-12}$ ; Eta-squared=0.25), and speed change over  
618 time ( $F_{18,319}=9.20$ ;  $p<2.00\times 10^{-16}$ ; Eta-squared=0.34). There were many pairwise differences  
619 between species in open field behavior, as shown in Supplementary Figure 1C and 3A-E.



625 the light-dark test (B), average velocity and approach/retreat velocity in the novel object test  
626 (C), and time spent in the corner and center regions in the open field test (D). Species  
627 differences were observed for every behavioral measure. For all panels, microhabitat  
628 (rock=yellow; intermediate=green; sand=blue) and evolutionary radiation (Mbuna=dark gray;  
629 shallow/benthic and utaka=light gray) are color coded and labeled. Dotted lines in all panels  
630 indicate null expected values.

631

### 632 3.4 Microhabitat predicts species differences in exploratory behaviors

633

634 We next investigated whether variation in exploratory behavior was associated with  
635 microhabitat. In order to test this, we subjected a larger set of species (n=19) representing  
636 three Lake Malawi microhabitats (rock, sand, and intermediate) to the open field test.  
637 Controlling for variation explained by phylogenetic factors (evolutionary radiation, genus, and  
638 species), we found significant associations between microhabitat and exploratory behavior in  
639 multiple open field behaviors. These results are organized into three lines of analysis below  
640 (two linear mixed effect regression models, and one MANOVA model; see “Effects of  
641 microhabitat on behavioral responses to novel stimuli” under “Methods” above for full  
642 statistical models).

643

644 Linear mixed effects regression revealed significant relationships between microhabitat  
645 (rock, sand, or intermediate) and open field behavior. Controlling for variation explained by  
646 phylogenetic factors, microhabitat was significantly associated with the number corner  
647 entries/exits ( $F=5.61$ ,  $p=0.014$ , Fig. 3A). This effect was driven by intermediate species  
648 entering and exiting the corners more than sand-dwellers ( $39.4 \pm 11.84$  more entries,  
649  $t=3.329$ , Tukey's HSD  $p=0.0096$ ), and a trend toward rock-dwelling species entering and  
650 exiting the corners more than sand-dwellers ( $36.2 \pm 15.11$  more entries,  $t=2.40$ , Tukey's  
651 HSD  $p=0.069$ ). This effect was consistent in direction and statistically significant (Tukey's  
652  $p<0.05$ ) regardless of whether test site was included in the model. Microhabitat was also  
653 associated with entries/exits to and from the center region ( $F=12.66$ ,  $p=5.72 \times 10^{-6}$ , Fig. 3C).  
654 When controlling for evolutionary radiation, the rock microhabitat was associated with more

655 center entries/exits than sand ( $6.5 \pm 2.14$  more entries,  $t=3.04$ , Tukey's HSD  $p=0.0074$ ) and  
656 intermediate ( $4.4 \pm 0.94$  more entries,  $t=4.70$ , Tukey's HSD  $p=1.15 \times 10^{-5}$ ). Notably, the  
657 relationship between microhabitat and center entries/exits was not statistically significant or  
658 trending when test site was removed from the model (Tukey's HSD  $p>0.10$  for both effects).  
659 A trend was also observed between microhabitat and total distance traveled ( $F=4.42$ ,  
660  $p=0.053$ , Fig. 3E), with intermediate species swimming farther during the test compared to  
661 sand-dwellers ( $1015 \pm 358$  cm further,  $t=2.84$ , Tukey's HSD  $p=0.0571$ ), and this effect was  
662 consistent in direction and statistically significant when test site was removed from the model  
663 (Tukey's HSD  $p=0.036$ ). In this model, microhabitat was not significantly associated with  
664 time spent in corner regions ( $F=0.41$ ,  $p=0.673$ , Fig. 3B) or time spent in the center region  
665 ( $F=0.70$ ,  $p=0.512$ , Fig. 3D), or change in speed over time ( $F=0.240$ ,  $p=0.79$ , Fig. 3F).

666

667 To further investigate the relationships between microhabitat and behavior, we tested a  
668 second model in which each microhabitat was designated as either intermediate (rock/sand  
669 interface) or non-intermediate (rock or sand). This model allowed effects of microhabitat to  
670 be more fully dissociated from effects of evolutionary radiation. The model also included an  
671 interaction term to test whether the intermediate microhabitat was differentially associated  
672 with behavior between evolutionary radiations. Consistent with findings from above, this  
673 model revealed a strong association between the intermediate microhabitat and entries/exits  
674 to and from the corner regions ( $F=27.08$ ,  $p=0.0011$ , Fig. 3A), and this relationship differed  
675 between evolutionary radiations ( $F=6.7945$ ,  $p=0.041$ ): although intermediate species made  
676 more entries/exits to and from the corner regions than non-intermediates in both lineages,  
677 the difference was much greater within the B/U radiation (estimated difference of  $50.2 \pm$   
678  $10.36$  more entries by intermediates vs. non-intermediates,  $t=2.61$ ,  $p=0.00056$ ) compared to  
679 the mbuna radiation (estimated difference of  $17.1 \pm 7.57$  more entries by intermediates vs.  
680 non-intermediates,  $t=2.26$ ,  $p=0.10$ ). The model also supported the association between  
681 intermediate microhabitat and distance traveled ( $F=9.17$ ,  $p=0.018$ , Fig. 3E), with  
682 intermediate species traveling farther than non-intermediates (estimated difference of  $729 \pm$   
683  $241$  cm farther,  $t=3.028$ ,  $p=0.018$ ). Lastly, the model revealed that the intermediate  
684 microhabitat was differentially related to swimming speeds in the mbuna versus B/U



685 radiations ( $F=5.70$ ,  $p=0.030$ ): controlling for microhabitat, mbuna intermediate species  
686 slowed down more than their non-intermediate counterparts during the test ( $32.1 \pm 12.46$   
687 mm/s greater decrease in swimming speed,  $t=2.572$ ,  $p=0.027$ ), and this pattern was  
688 reversed but not statistically significant in B/U species ( $12.9 \pm 15.52$  mm/s greater *increase*  
689 in swimming speed,  $t=0.34$ ,  $p=0.41$ ). All of the above effects were statistically significant  
690 (Tukey's  $p<0.05$ ) when test site was excluded from the model, with the exception of the  
691 interaction between radiation, microhabitat, and change in speed (Tukey's  $p>0.10$ ). The full  
692 linear regression results for open field behavior, including estimates for pairwise differences  
693 between microhabitats, are presented in Tables 1 and 2.

694

695 Microhabitat was also associated with additional patterns of movement over time in the open  
696 field test (repeated measures MANOVA, full model  $F_{(4,336)}=11.81$ ,  $p<0.0001$ ). Both frequency  
697 of freezing ( $F_{(2,336)}=15.64$   $p<0.0001$ ) and the pattern of freezing over time (Wilks' Lambda  
698 value 0.866, approx.  $F_{(8,666)}=6.23$ ,  $p<0.0001$ ) were associated with microhabitat. Intermediate  
699 species initially froze more frequently and exhibited a decrease in slowed swimming as the  
700 assay progressed, whereas sand species initially froze less but tended to freeze more as the  
701 assay progressed (Fig. 3G).

702

### 703 3.6 Open field behaviors differ between mbuna and benthic/utaka radiations

704

705 The same linear mixed effects regression models described above were used to test for  
706 relationships between evolutionary radiation and behavior. Controlling for variance explained  
707 by microhabitat, these models revealed that mbuna vs. B/U radiations differed in time spent  
708 in corner regions ( $F=7.065$ ,  $p=0.018$ , Table 2, Fig. 3H), time spent in the center region  
709 ( $F=5.32$ ,  $p=0.047$ , Table 2), and entries/exits to and from the center region (Model 1,  
710  $F=13.25$ ,  $p=0.0029$ , Table 1; Model 2,  $F=5.55$ ,  $p=0.043$ , Table 2). In comparison to B/U  
711 species, mbuna species spent more time in the corner regions ( $45.6 \pm 17.2$  seconds,  
712  $t=2.658$ ,  $p=0.0175$ ), less time in the center region ( $24.0 \pm 10.4$  seconds,  $t=2.306$ ,  $p=0.0472$ ),  
713 and made fewer entries/exits to and from the center region ( $4.5 \pm 1.9$  fewer entries/exits,  
714  $t=2.356$ ,  $p=0.0428$ ). The direction of all three of these effects was the same at both test

715 sites, and all three of these effects were consistent in direction and statistically significant or  
716 trending towards significance when test site was excluded from the model (Tukey's  $p < 0.10$   
717 for all). A trend toward differences in speed change over time was also observed between  
718 radiations ( $F = 3.62$ ,  $p = 0.086$ ), with mbuna species slowing more as the assay progressed  
719 compared to B/U species ( $19.1 \pm 10.1$  mm/s greater decrease in swimming speed,  $t = 1.902$ ,  
720  $p = 0.0863$ ). This effect was consistent in direction at both test sites and was statistically  
721 significant and consistent in direction when test site was excluded from the model ( $p = 0.032$ ).  
722 Notably, for all (6/6) open field behaviors analyzed, significant or trending relationships with  
723 microhabitat and/or evolutionary radiation were found regardless of whether test site was  
724 included in the model.

725

#### 726 *Novel tank test*

727

728 Because of the strong differences between mbuna versus B/U radiations in open field  
729 behavior, we also reanalyzed novel tank data, in which four mbuna rock-dwelling species  
730 and four B/U sand-dwelling species were tested. Consistent with differences in corner  
731 behavior in the open field test, a linear mixed effects regression showed that mbuna rock-  
732 dwellers remained significantly closer to outer corner regions compared to B/U sand-  
733 dwellers in the novel tank test ( $0.56 \pm 0.23$  cm closer,  $t = 2.43$ ;  $p = 0.038$ , Fig. 3I), but did not  
734 differ in the other analyzed dimensions of behavior.

735

736

737

738

739

740

741

742

743

744

| <b>OF behavior ~ microhabitat + radiation + (genus/species) + test site + arena size</b> |                          |                                   |                 |             |               |                                |
|------------------------------------------------------------------------------------------|--------------------------|-----------------------------------|-----------------|-------------|---------------|--------------------------------|
| <b>Behavior</b>                                                                          | <b>Fixed effect</b>      | <b>Comparison</b>                 | <b>Estimate</b> | <b>S.E.</b> | <b>t</b>      | <b>Tukey's p</b>               |
| Time in corners (s)                                                                      | Microhabitat             | Rock-Sand                         | 41.5            | 32.4        | 1.281         | 0.4237                         |
|                                                                                          |                          | Rock-Inter                        | 26.6            | 20.7        | 1.282         | 0.4249                         |
|                                                                                          |                          | Sand-Inter                        | -14.9           | 24.6        | -0.61         | 0.8189                         |
|                                                                                          | Radiation                | Mbuna-Benthic/Utaka               | 23.9            | 24.4        | 0.979         | 0.3404                         |
| <u>Corner entries and exits</u>                                                          | <u>Microhabitat</u> *    | <u>Rock-Sand</u>                  | 36.2            | 15.1        | 2.398         | 0.0689 .                       |
|                                                                                          |                          | Rock-Inter                        | -3.2            | 9.3         | -0.344        | 0.9371                         |
|                                                                                          |                          | <b><u>Sand-Inter</u></b>          | <b>-39.4</b>    | <b>11.8</b> | <b>-3.329</b> | <b>0.0096 **</b>               |
|                                                                                          | Radiation                | Mbuna-Benthic/Utaka               | -16.4           | 13          | -1.265        | 0.2283                         |
| Time in center (s)                                                                       | Microhabitat             | Rock-Sand                         | -18.2           | 18.8        | -0.966        | 0.6070                         |
|                                                                                          |                          | Rock-Inter                        | -13.4           | 11.9        | -1.125        | 0.5138                         |
|                                                                                          |                          | Sand-Inter                        | 4.8             | 14.4        | 0.332         | 0.9412                         |
|                                                                                          | Radiation                | Mbuna-Benthic/Utaka               | -3.6            | 14.2        | -0.251        | 0.8046                         |
| <u>Center entries and exits</u>                                                          | <u>Microhabitat</u> **** | <b>Rock-Sand</b>                  | <b>6.5</b>      | <b>2.1</b>  | <b>3.041</b>  | <b>0.0074 *</b>                |
|                                                                                          |                          | <b>Rock-Inter</b>                 | <b>4.4</b>      | <b>0.9</b>  | <b>4.701</b>  | <b>1.2x10<sup>-5</sup>****</b> |
|                                                                                          |                          | Sand-Inter                        | -2.1            | 2.1         | -1.008        | 0.5724                         |
|                                                                                          | <u>Radiation</u> **      | <b><u>Mbuna-Benthic/Utaka</u></b> | <b>-9.6</b>     | <b>2.6</b>  | <b>-3.640</b> | <b>0.0029 **</b>               |
| <u>Distance traveled (cm)</u>                                                            | <u>Microhabitat</u> .    | Rock-Sand                         | 728             | 452         | 1.611         | 0.2731                         |
|                                                                                          |                          | Rock-Inter                        | -288            | 290         | -0.991        | 0.5959                         |
|                                                                                          |                          | <u>Sand-Inter</u>                 | -1015           | 358         | -2.839        | 0.0572 .                       |
|                                                                                          | Radiation                | Mbuna-Benthic/Utaka               | -308            | 338         | -0.909        | 0.3771                         |
| Speed change (mm/s)                                                                      | Microhabitat             | Rock-Sand                         | -28.9           | 20.1        | -1.441        | 0.3419                         |
|                                                                                          |                          | Rock-Inter                        | -18.3           | 13.0        | -1.406        | 0.3604                         |
|                                                                                          |                          | Sand-Inter                        | 10.6            | 16.9        | 0.630         | 0.8054                         |
|                                                                                          | Radiation                | Mbuna-Benthic/Utaka               | 27.7            | 15.2        | 1.819         | 0.1005                         |

745 **Table 1. Effects of microhabitat and evolutionary radiation on open field behavior.**

746 Summary of linear mixed effect regression output for associations between microhabitat,  
747 evolutionary radiation (mbuna versus B/U), and exploratory behaviors in the open field test.

748 The full regression model is shown at the top of the table and was fit to open field behavioral  
749 data, with bold italicized terms representing fixed effects, and non-bold italicized terms

750 representing random effects, with nested terms in parentheses. For each behavior, the

751 standard output from linear regression in R is summarized, organized by fixed effect and

752 then by pairwise comparisons between each level of each fixed effect. The output includes

753 the estimated difference between levels of each fixed effect, as well as the standard error, t-

754 statistic, and Tukey's HSD p-value for each difference. Behaviors, fixed effects, and levels of

756 (Tukey's HSD  $p < 0.05$ ) in the model. Behaviors, fixed effects, and levels of fixed effects that  
 757 are underlined were found to be statistically significant or trending in this model and also in a  
 758 second model excluding test site from the model (Tukey's HSD  $p < 0.10$  in both models).  
 759 Asterisks indicate levels of significance (\* for  $p < 0.05$ ; \*\* for  $p < 0.005$ ; \*\*\* for  $p < 0.0005$ ; \*\*\*\* for  
 760  $p < 0.00005$ ; and "." for  $p < 0.10$ ).

761

| <b>OF behavior ~ intermediate + radiation + intermediate*radiation + (genus/species) + test site + arena size</b> |                                 |                                                 |                 |             |               |                  |
|-------------------------------------------------------------------------------------------------------------------|---------------------------------|-------------------------------------------------|-----------------|-------------|---------------|------------------|
| <b>Behavior</b>                                                                                                   | <b>Fixed effect</b>             | <b>Comparison</b>                               | <b>Estimate</b> | <b>S.E.</b> | <b>t</b>      | <b>Tukey's p</b> |
| <b><u>Time in corners (s)</u></b>                                                                                 | Inter                           | Inter - Non-inter                               | -1.1            | 17.2        | -0.066        | 0.9481           |
|                                                                                                                   | <b><u>Radiation</u> *</b>       | <b><u>Mbuna - Benthic/Utaka</u></b>             | <b>45.6</b>     | <b>17.2</b> | <b>2.658</b>  | <b>0.0175 *</b>  |
|                                                                                                                   | Inter*Radiation                 | Mbuna (Inter - Non-inter)                       | -16.9           | 23.7        | -0.711        | 0.8912           |
|                                                                                                                   |                                 | Benthic/Utaka (Inter - Non-inter)               | 14.6            | 25.0        | 0.583         | 0.9358           |
| <b><u>Corner entries and exits</u></b>                                                                            | <b><u>Inter</u> **</b>          | <b><u>Inter - (Non-inter)</u></b>               | <b>33.7</b>     | <b>6.5</b>  | <b>5.196</b>  | <b>0.0011 **</b> |
|                                                                                                                   | Radiation                       | Mbuna - Benthic/Utaka                           | 4.69            | 10.4        | 0.452         | 0.6650           |
|                                                                                                                   | <b><u>Inter*Radiation</u> *</b> | Mbuna (Inter - Non-inter)                       | 17.1            | 7.6         | 2.264         | 0.2775           |
|                                                                                                                   |                                 | <b><u>Benthic/Utaka (Inter - Non-inter)</u></b> | <b>50.2</b>     | <b>10.4</b> | <b>4.848</b>  | <b>0.0027 **</b> |
| <b><u>Time in center (s)</u></b>                                                                                  | Inter                           | Inter - (Non-inter)                             | -16.4           | 9.7         | -1.685        | 0.1138           |
|                                                                                                                   | <b><u>Radiation</u> *</b>       | <b><u>Mbuna - Benthic/Utaka</u></b>             | <b>-24.0</b>    | <b>10.4</b> | <b>-2.306</b> | <b>0.0472 *</b>  |
|                                                                                                                   | Inter*Radiation                 | Mbuna (Inter - Non-inter)                       | -16.1           | 11.0        | -1.473        | 0.5404           |
|                                                                                                                   |                                 | Benthic/Utaka (Inter - Non-inter)               | -16.7           | 15.2        | -1.100        | 0.6941           |
| <b><u>Center entries and exits</u></b>                                                                            | Inter                           | Inter - (Non-inter)                             | 2.0             | 1.7         | 1.190         | 0.2531           |
|                                                                                                                   | <b><u>Radiation</u> *</b>       | <b><u>Mbuna - Benthic/Utaka</u></b>             | <b>-4.52</b>    | <b>1.9</b>  | <b>-2.356</b> | <b>0.0428 *</b>  |
|                                                                                                                   | Inter*Radiation                 | Mbuna (Inter - Non-inter)                       | 0.0             | 2.06        | 0.014         | 1.00             |
|                                                                                                                   |                                 | Benthic/Utaka (Inter - Non-inter)               | 4.0             | 2.6         | 1.545         | 0.4366           |
| <b><u>Distance traveled (cm)</u></b>                                                                              | <b><u>Inter</u> *</b>           | <b><u>Inter - (Non-inter)</u></b>               | <b>729</b>      | <b>241</b>  | <b>3.028</b>  | <b>0.0183 *</b>  |
|                                                                                                                   | Radiation                       | Mbuna - Benthic/Utaka                           | 127             | 230         | 0.552         | 0.5901           |
|                                                                                                                   | Inter*Radiation                 | Mbuna (Inter - Non-inter)                       | 433             | 315         | 1.376         | 0.5368           |
|                                                                                                                   |                                 | <b><u>Benthic/Utaka (Inter - Non-inter)</u></b> | <b>1024</b>     | <b>351</b>  | <b>2.914</b>  | <b>0.0753 .</b>  |
| <b><u>Speed change (mm/s)</u></b>                                                                                 | Inter                           | Inter - (Non-inter)                             | 9.56            | 10.4        | 0.915         | 0.3718           |
|                                                                                                                   | Radiation .                     | <b><u>Mbuna - Benthic/Utaka</u></b>             | 19.1            | 10.1        | 1.902         | 0.0863 .         |
|                                                                                                                   | <b><u>Inter*Radiation</u> *</b> | Mbuna (Inter - Non-inter)                       | 32.06           | 12.5        | 2.573         | 0.1060           |
|                                                                                                                   |                                 | Benthic/Utaka (Inter - Non-inter)               | -12.94          | 15.5        | -0.834        | 0.8377           |

762 **Table 2. Effects of intermediate microhabitat and evolutionary radiation on open field**  
 763 **behavior.** Linear mixed effect regression output testing associations between intermediate  
 764 (versus non-intermediate) microhabitat, evolutionary radiation (mbuna versus B/U), the  
 765 interaction between microhabitat and radiation, and exploratory behaviors in the open field  
 766 (OF) test. For each behavior, the standard output from linear regression in R is summarized

767 as explained above for Table 1. Behaviors, fixed effects, and levels of fixed effects in bold  
 768 indicate associations that were found to be statistically significant (Tukey's HSD  $p < 0.05$ ) in  
 769 the model. Behaviors, fixed effects, and levels of fixed effects that are underlined were found  
 770 to be statistically significant or trending in this model and also in a second model excluding  
 771 test site (Tukey's HSD  $p < 0.10$  in both models). Asterisks indicate levels of significance (\* for  
 772  $p < 0.05$ ; \*\* for  $p < 0.005$ ; "." For  $p < 0.10$ ).

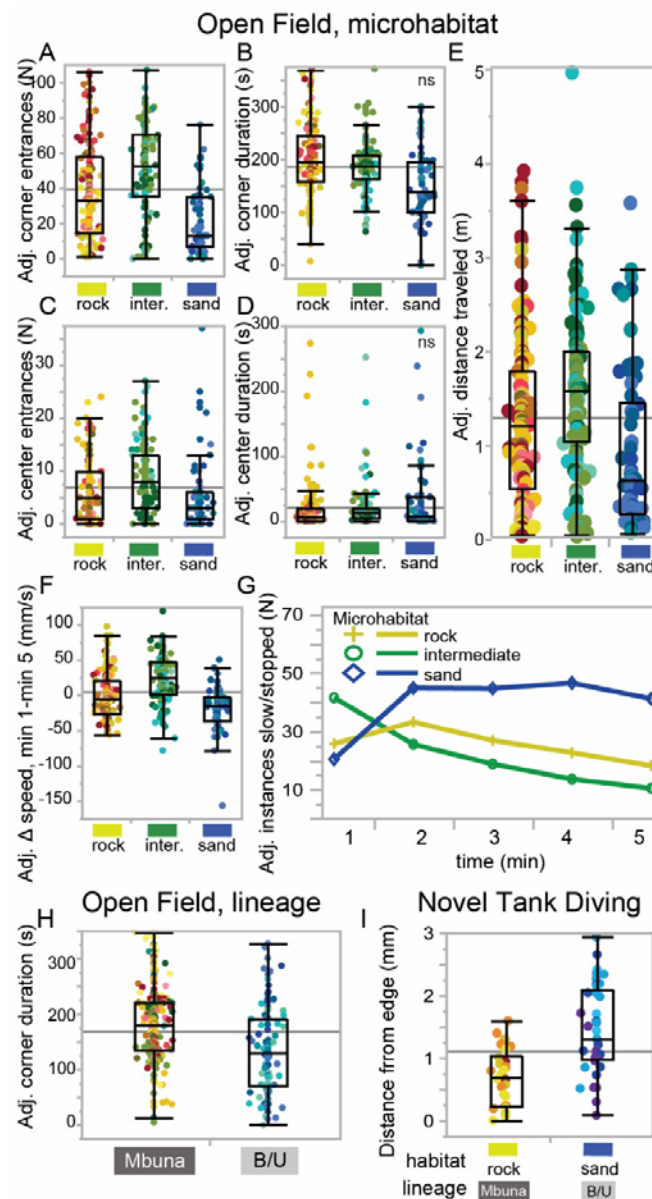

773

774 **Figure 3. Exploratory behavior is associated with microhabitat and evolutionary**  
 775 **radiation.** Variation in open field and novel tank behaviors associated with microhabitat and  
 776 evolutionary radiation. Open field behaviors are adjusted for lab and arena size based on  
 777 estimates from linear regression. Controlling for phylogenetic factors, corner entrances/exits

779 (p=0.014). Center entries/exits (C), but not time in the center (D), are also associated with  
780 microhabitat (p<0.0001). The association between microhabitat and distance traveled (E) is  
781 trending towards significance (p=0.053). Microhabitat is not associated with change in speed  
782 over the course of the open field test (F); however, microhabitat is significantly associated  
783 with instances of stopping and slowed swimming (G) throughout the open field test  
784 (p<0.0001). Exploratory behaviors are also associated with evolutionary radiation (mbuna  
785 versus shallow/deep benthic and utaka, B/U). Controlling for variance explained by  
786 intermediate versus non-intermediate microhabitat, Mbuna species spent significantly more  
787 time in corners (H), less time in the center (not shown), and made more entries/exits into the  
788 center compared to B/U species (p<0.05 for all). Mbuna rock-dwellers also remained  
789 significantly closer to the corners in the novel tank test compared to B/U sand-dwellers (I;  
790 p=0.038).

791

792 3.6 Exploratory behaviors are not strongly correlated across contexts in Lake Malawi cichlids

793

794 We next investigated evidence for phenotypic integration versus phenotypic modularity of  
795 exploratory behaviors in Lake Malawi cichlids. To do this, we analyzed correlations of  
796 exploratory behaviors across novel contexts using MMC, which identifies clusters of  
797 covariation in large multivariate datasets. We reasoned that if exploratory behaviors are  
798 phenotypically integrated, we would expect to observe strong correlations in exploratory  
799 behaviors across novel contexts. In contrast, if exploratory behaviors are modular, we would  
800 expect to observe weak or no correlations in exploratory behaviors across contexts. As a  
801 ground truth and control, we first demonstrated that MMC could reveal clusters of correlated  
802 behaviors across contexts by re-analyzing a previously published dataset from selectively  
803 bred high- and low-exploratory strains of wild-derived zebrafish. In this study, subjects were  
804 phenotyped across a battery of assays (including the novel tank, light-dark, and open field  
805 tests among others) and were found to exhibit correlated behaviors across assays (Wong *et*  
806 *al*, 2012). As expected, MMC revealed extensive across-assay clustering in this dataset, with  
807 five of the eight (62.5%) clusters spanning multiple assays (including clustering across novel  
808 tank and light-dark assays). We then applied MMC to two independent Lake Malawi cichlid

809 datasets, one in which subjects were phenotyped across two behavioral assays (novel tank  
810 test and light-dark test) at INSTITUTION 1, and a second in which subjects were phenotyped  
811 across three behavioral assays (open field test, novel object test, and resident intruder test)  
812 at INSTITUTION 2. For both Malawi cichlid datasets, behavioral clusters grouped exclusively  
813 within assay rather than across assays—zero of ten (0%) modules from the INSTITUTION 2  
814 data set and zero of three (0%) modules from the INSTITUTION 1 data set spanned multiple  
815 assays.

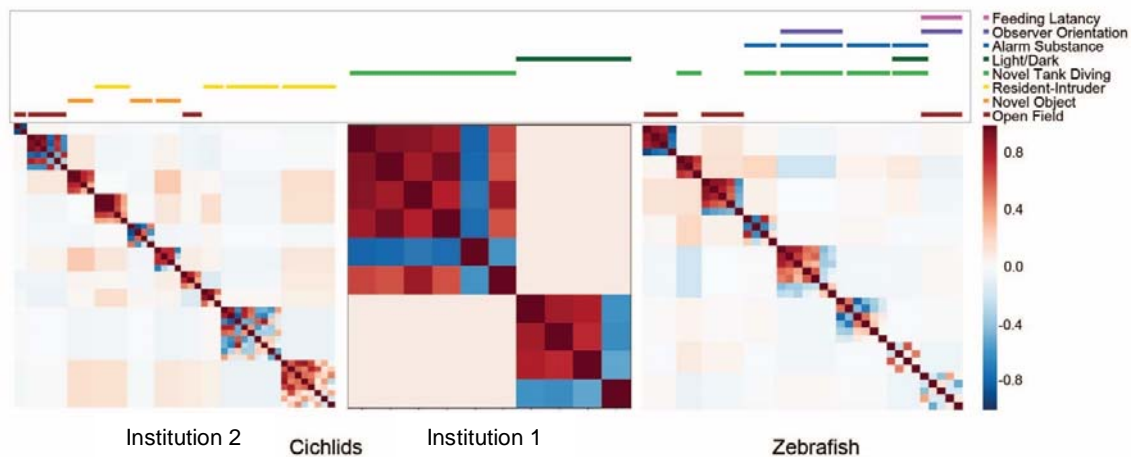

816

817 **Figure 3. Behavioral modularity analysis across assays in Lake Malawi cichlids and**  
818 **high- and low-anxiety strains of zebrafish.** MMC analysis of correlated behaviors across  
819 contexts shows extensive clustering within assays in cichlids (INSTITUTION 2 and  
820 INSTITUTION 1). In contrast, high- and low-exploratory strains of zebrafish show extensive  
821 clustering across assays, indicating strong correlations in behaviors across contexts. Each  
822 entry into the matrix is a single behavioral measurement (such as seconds in the corner  
823 [open field], or latency to enter the top of the arena [novel tank]). The modules show the  
824 pairwise correlations between behavioral measurements across all individuals, with dark red  
825 indicating a strong positive correlation and dark blue indicating a strong negative correlation.  
826 The color-coded line(s) above each heatmap indicate behavioral assay(s) represented in  
827 each module.

828

829 4 **Discussion**

831 We phenotyped a wide array of Lake Malawi cichlid species in three classic novel  
832 environment assays for the first time. Collectively, Lake Malawi cichlids showed strong  
833 behavioral patterns that mirrored those of other teleost lineages in all three assays (novel  
834 tank test, light-dark test, open field test), spending less time in the top half in the novel tank  
835 test, the light half in the light-dark test, and the center region in the open field test (Maximino,  
836 de Brito, de Moraes et al., 2007; Stewart, Cachat, Wong et al., 2010; Stewart, Gaikwad,  
837 Kyzar et al., 2012; Yoshida, Nagamine, & Uematsu, 2005). The directions of bias in the light-  
838 dark and open field tests also match biases displayed by terrestrial vertebrates in similarly  
839 designed assays: for example, mice and rats spend less time in the light zone in the light-  
840 dark test and the center region in the open field test (Bailey & Crawley, 2009; Ramos,  
841 Berton, Mormède et al., 1997). Taken together, these results support conserved behavioral  
842 and/or stress responses to specific types of novel stimuli that are shared between Lake  
843 Malawi cichlids and other teleosts, and more broadly across vertebrates.

844

845 Although the direction of these biases was consistent in all species tested, some species  
846 exhibited significantly weaker or stronger biases compared to others. For example, the B/U  
847 sand-dweller *Mchenga conophoros* spent significantly more time in the top half of the novel  
848 tank test compared to every other species tested; and the B/U sand-dweller *Copadichromis*  
849 *virginalis* spent significantly more time in the light half of the light-dark test compared to  
850 several other species. Future studies are needed to understand the ecological and/or  
851 biological factors contributing to these differences. The ability to hybridize Lake Malawi  
852 cichlids across species boundaries is a promising strategy for identifying natural genetic  
853 variants contributing to these behavioral differences.

854

855 We also investigated the degree of phenotypic diversity in exploratory behaviors in Lake  
856 Malawi cichlids. To place our analyses in a frame of reference, we measured phenotypic  
857 variance in novel tank behavior among Lake Malawi cichlids and among three laboratory  
858 strains of zebrafish that were tested with the same parameters in a previous study: two wild-  
859 derived strains that were selectively bred for extreme and opposite exploratory behaviors,  
860 and a common wild-type laboratory strain (AB). It is worth noting that previous studies have



861 demonstrated that the average genetic divergence between Lake Malawi cichlid species is  
862 less than between common laboratory strains of zebrafish (Loh, Katz, Mims et al., 2008). We  
863 found that Lake Malawi cichlids collectively exhibited significantly greater variance in multiple  
864 dimensions of exploratory behavior compared to the zebrafish strains, including time spent in  
865 the top half and entries into the top half. These results suggest that natural evolution in Lake  
866 Malawi cichlids has resulted in extreme phenotypic diversity in exploratory behaviors, similar  
867 to other complex traits such as morphology and color patterning.

868

869 We tested the extent to which this phenotypic diversity is explained by species differences.  
870 Strong species differences were observed for nearly every dimension of exploratory  
871 behavior analyzed across all assays. Taken together, these results show that the extreme  
872 diversity in exploratory behaviors in Lake Malawi cichlids is explained in part by patterns of  
873 strong divergence along species lines. This is consistent with findings in other vertebrate  
874 lineages, in which behavioral responses to novel stimuli have rapidly diverged between  
875 closely-related species of birds and mammals (Cowan, 1977; R. S. Greenberg, 2003; C.  
876 Mettke-Hofmann, Winkler, Hamel et al., 2013; Claudia Mettke-Hofmann, Winkler, & Leisler,  
877 2002). Considering the low genetic divergence and ability to hybridize between species,  
878 these results further demonstrate that Lake Malawi cichlids are a powerful complementary  
879 system to traditional laboratory models for understanding the genetic basis of naturally  
880 evolved species differences in exploratory behaviors.

881

882 To investigate the ecological basis of species differences in exploratory behavior, we  
883 phenotyped 19 species spanning three Lake Malawi microhabitats (rock, sand, and  
884 intermediate) in the open field test, and analyzed the relationship between microhabitat and  
885 behavior. Controlling for variation explained by phylogenetic factors, microhabitat was  
886 associated with multiple dimensions of open field behavior, including entries/exits to and  
887 from the corners, entries/exits to and from the center, and total distance traveled. Notably,  
888 intermediate species traveled significantly farther and made significantly more entries/exits  
889 to and from the corners compared to non-intermediate species, suggesting that intermediate  
890 species exhibit distinct exploratory behavioral phenotypes compared to rock- and sand-

891 dwelling species. Interestingly, the relationship between intermediate habitat and behavior  
892 also differed between the mbuna and B/U radiations for multiple dimensions of open field  
893 behavior, including corner entries/exits and speed change over time. These results support  
894 the idea that unique behavioral specializations are associated with divergence into the  
895 intermediate habitat between the mbuna and B/U radiations.

896

897 We also investigated whether two major Lake Malawi cichlid radiations (mbuna versus B/U)  
898 are associated with species differences in exploratory behaviors. Controlling for variation  
899 explained by microhabitat, multiple dimensions of exploratory behavior differed significantly  
900 between the mbuna and B/U radiations, including time spent in the corners, time spent in the  
901 center, and center entries/exits. In all three cases, the mbuna species exhibited less  
902 exploratory phenotypes compared to B/U species. Consistent with this pattern, mbuna rock-  
903 dwellers also remained significantly closer to the corner regions in the novel tank test  
904 compared to B/U sand-dwellers. Taken together, these results provide evidence for  
905 behavioral divergence between two major cichlid radiations in Lake Malawi. One potential  
906 explanation for these data is that behavioral preferences for edges or corners helps mediate  
907 behavioral preferences for the narrow crevasses and caves characteristic of rocky habitats;  
908 inversely, a reduced aversion toward open environments may facilitate preferences for  
909 and/or invasion of new and potentially more exposed habitats. Future experiments are  
910 needed to understand how differences in exploratory behaviors are linked to variation in  
911 neural structure and function. Notably, mbuna versus B/U lineages exhibit fixed genetic  
912 differences as well as neurogenetic and neuroanatomical specializations (e.g. volume of the  
913 cerebellum and telencephalon) (Huber, van Staaden, Kaufman et al., 1997; Sylvester, Rich,  
914 Loh et al., 2010), highlighting potential substrates for behavioral divergence.

915

916 Comparative studies in Lake Malawi cichlids have previously demonstrated modular patterns  
917 of covariation for several complex traits that are thought to have played a central role in  
918 cichlid diversification, including oral jaw morphology and color patterning (R. Craig Albertson,  
919 Powder, Hu et al., 2014; Parsons, Cooper, & Albertson, 2011). Briefly, evolutionary  
920 modularity and integration refer to distinct patterns of covariation among sets of traits across

921 taxa. For example, if the dimensions of different oral jaw bones are correlated in the same  
922 way across species, then they are considered to be evolutionarily integrated. In contrast, if  
923 they are uncorrelated or are correlated non-uniformly across taxa, they are more modular  
924 and are generally considered to be more evolvable, although see Armbruster et al.  
925 (Armbruster, Pélabon, Bolstad et al., 2014). Similarly, we reasoned that, because behaviors  
926 in response to a given context are measurable traits, behavioral correlations across contexts  
927 can provide evidence for behavioral integration versus behavioral modularity.

928

929 Following this logic, we tracked individual subjects across assays to investigate whether  
930 patterns of covariation in Lake Malawi cichlid exploratory behaviors are modular or  
931 integrated. To do this, we applied MMC, a statistical approach designed to identify clusters  
932 of covariation in large multivariate datasets. We first applied MMC to a previously published  
933 dataset in which laboratory strains of zebrafish were found to exhibit correlated, or  
934 syndromic, behaviors across contexts (Baker, Goodman, Santo et al., 2018; Wong, Perrin,  
935 Oxendine et al., 2012). This analysis revealed extensive clustering across assays, indicating  
936 that behaviors were correlated across contexts. We then applied MMC to two independent  
937 Malawi cichlid datasets, in which subjects were phenotyped in different assays at two  
938 separate institutions. In both datasets, behaviors clustered exclusively within assay. Taken  
939 together, these results support the hypothesis that, like other complex traits, Lake Malawi  
940 cichlids exhibit modular patterns of behavioral variation. Future studies are needed to  
941 investigate whether exploratory behaviors are more evolvable in this species assemblage,  
942 and whether they have played a causal role in cichlid diversification.

943

944 There are several limitations to these experiments. First, these assays do not reflect  
945 environmental conditions in Lake Malawi, and therefore it is unclear how behavioral  
946 phenotypes in these experiments map onto behavior in natural environments. Additionally,  
947 although the number of species investigated was larger than most comparative behavioral  
948 investigations, larger samples of species and individuals may uncover additional links  
949 between more specific dimensions of ecology and behavioral variation. For example, factors  
950 such as diet, resource distribution, population density, turbidity, depth, and/or predation risk

951 may explain species differences in behavioral responses to novel stimuli. Additional factors  
952 may also influence behavioral responses to novel stimuli across species, such as  
953 developmental stage, sex, or social context. These questions were beyond the scope of this  
954 study and are promising areas for future research.

955

956 Despite these limitations, these experiments constitute a large comparative investigation of  
957 exploratory behavioral variation in a previously untested vertebrate system. We phenotype a  
958 total of 23 new species in a variety of classic behavioral assays and show conserved  
959 behavioral responses that mirror other teleosts and rodents. We demonstrate high  
960 phenotypic variance in exploratory behaviors that segregates along species lines. We further  
961 link exploratory behavioral variation to microhabitat and to the major mbuna and  
962 benthic/utaka evolutionary radiations. Lastly, we provide evidence for behavioral modularity  
963 in Lake Malawi cichlids. Taken together, these findings provide new insights into the ecology  
964 and evolution of exploratory behaviors, and demonstrate Lake Malawi cichlids as a powerful  
965 complement to traditional models for investigating the ecological, genetic, and neural factors  
966 underlying natural behavioral diversity.

967

968

969

970

971

972

973

974

975

976

977

978

979

980

981 **References**

- 982 Albertson, R. C. (2008). *Morphological Divergence Predicts Habitat Partitioning in a Lake*  
983 *Malawi Cichlid Species Complex* (Vol. 2008): BIOONE.
- 984 Albertson, R. C., Markert, J. A., Danley, P. D., & Kocher, T. D. (1999). Phylogeny of a rapidly  
985 evolving clade: the cichlid fishes of Lake Malawi, East Africa. *Proc Natl Acad Sci U S*  
986 *A*, 96(9), 5107-5110.
- 987 Albertson, R. C., Powder, K. E., Hu, Y., Coyle, K. P., Roberts, R. B., & Parsons, K. J. (2014).  
988 Genetic basis of continuous variation in the levels and modular inheritance of  
989 pigmentation in cichlid fishes. *Molecular Ecology*, 23(21), 5135-5150.
- 990 Albertson, R. C., Strelman, J. T., & Kocher, T. D. (2003). Directional selection has shaped  
991 the oral jaws of Lake Malawi cichlid fishes. *Proceedings of the National Academy of*  
992 *Sciences of the United States of America*, 100(9), 5252-5257.
- 993 Armbruster, W. S., Pélabon, C., Bolstad, G. H., & Hansen, T. F. (2014). Integrated  
994 phenotypes: understanding trait covariation in plants and animals. *Philosophical*  
995 *transactions of the Royal Society of London. Series B, Biological sciences*,  
996 369(1649), 20130245-20130245.
- 997 Bailey, K. R., & Crawley, J. N. (2009). Anxiety-related behaviors in mice.
- 998 Baker, M. R., Goodman, A. C., Santo, J. B., & Wong, R. Y. (2018). Repeatability and  
999 reliability of exploratory behavior in proactive and reactive zebrafish, *Danio rerio*.  
1000 *Scientific reports*, 8(1), 12114-12114.
- 1001 Bloomquist, R. F., Parnell, N. F., Phillips, K. A., Fowler, T. E., Yu, T. Y., Sharpe, P. T., et al.  
1002 (2015). Coevolutionary patterning of teeth and taste buds. *Proc Natl Acad Sci U S A*,  
1003 112(44), E5954-5962.
- 1004 Brawand, D., Wagner, C. E., Li, Y. I., Malinsky, M., Keller, I., Fan, S., et al. (2014). The  
1005 genomic substrate for adaptive radiation in African cichlid fish. *Nature*, 513(7518),  
1006 375-381.
- 1007 Conith, M. R., Hu, Y., Conith, A. J., Maginnis, M. A., Webb, J. F., & Albertson, R. C. (2018).  
1008 Genetic and developmental origins of a unique foraging adaptation in a Lake Malawi  
1009 cichlid genus. *Proc Natl Acad Sci U S A*, 115(27), 7063-7068.
- 1010 Cowan, P. E. (1977). Neophobia and neophilia: New-object and new-place reactions of three  
1011 *Rattus* species. *Journal of Comparative and Physiological Psychology*, 91(1), 63-71.
- 1012 Danley, P. D. (2011). Aggression in closely related Malawi cichlids varies inversely with  
1013 habitat complexity. [journal article]. *Environmental Biology of Fishes*, 92(3), 275.
- 1014 Dingemans, N. J., Both, C., Drent, P. J., & Tinbergen, J. M. (2004). Fitness consequences  
1015 of avian personalities in a fluctuating environment. *Proc Biol Sci*, 271(1541), 847-852.
- 1016 Dingemans, N. J., Wright, J., Kazem, A. J. N., Thomas, D. K., Hickling, R., & Dawnay, N.  
1017 (2007). Behavioral syndromes differ predictably between 12 populations of three-  
1018 spined stickleback. *Journal of Animal Ecology*, 76(6), 1128-1138.
- 1019 Ferrari, M. C., McCormick, M. I., Meekan, M. G., & Chivers, D. P. (2015). Background level  
1020 of risk and the survival of predator-naïve prey: can neophobia compensate for  
1021 predator naivety in juvenile coral reef fishes? *Proc Biol Sci*, 282(1799), 20142197.
- 1022 Garland, T., & Adolph, S. C. (1994). Why Not to Do Two-Species Comparative Studies:  
1023 Limitations on Inferring Adaptation. *Physiological Zoology*, 67(4), 797-828.
- 1024 Greenberg, R. (2003). The role of neophobia and neophilia in the development of innovative  
1025 behavior of birds. In S. M. Reader & K. N. Laland (Eds.), *Animal Innovation* (pp. 175--  
1026 196): Oxford University Press.
- 1027 Greenberg, R., & Mettke-hofmann, C. (2001). Ecological Aspects of Neophobia and  
1028 Neophilia in Birds. In V. Nolan & C. F. Thompson (Eds.), *Current Ornithology* (pp.  
1029 119-178). Boston, MA: Springer US.
- 1030 Greenberg, R. S. (2003). The role of neophobia and neophilia in the development of  
1031 innovative behavior of birds.
- 1032 Huber, R., van Staaden, M. J., Kaufman, L. S., & Liem, K. F. (1997). Microhabitat use,  
1033 trophic patterns, and the evolution of brain structure in African cichlids. *Brain Behav*  
1034 *Evol*, 50(3), 167-182.

- 1035 Johnson, Z. V., & Young, L. J. (2018). Evolutionary diversity as a catalyst for biological  
1036 discovery. *Integr Zool*.
- 1037 Kocher, T. D. (2004). Adaptive evolution and explosive speciation: the cichlid fish model. *Nat*  
1038 *Rev Genet*, 5(4), 288-298.
- 1039 Konings, A. (2007). *Lake Malawi Cichlids in Their Natural Habitat*.
- 1040 Kratochwil, C. F., Liang, Y., Gerwin, J., Woltering, J. M., Urban, S., Henning, F., et al.  
1041 (2018). Agouti-related peptide 2 facilitates convergent evolution of stripe patterns  
1042 across cichlid fish radiations. *Science*, 362(6413), 457-460.
- 1043 Lapedra, O., Schoener, T. W., Leal, M., Losos, J. B., & Kolbe, J. J. (2018). Predator-driven  
1044 natural selection on risk-taking behavior in anole lizards. *Science*, 360(6392), 1017-  
1045 1020.
- 1046 Loh, Y. H., Katz, L. S., Mims, M. C., Kocher, T. D., Yi, S. V., & Strelman, J. T. (2008).  
1047 Comparative analysis reveals signatures of differentiation amid genomic  
1048 polymorphism in Lake Malawi cichlids. *Genome Biol*, 9(7), R113.
- 1049 Malinsky, M., Svoldal, H., Tyers, A. M., Miska, E. A., Genner, M. J., Turner, G. F., et al.  
1050 (2018). Whole-genome sequences of Malawi cichlids reveal multiple radiations  
1051 interconnected by gene flow. *Nat Ecol Evol*, 2(12), 1940-1955.
- 1052 Maximino, C., de Brito, T. M., de Moraes, F. D., de Oliveira, F. V. C., Taccolini, I. B., Pereira,  
1053 P. M., et al. (2007). A comparative analysis of the preference for dark environments  
1054 in five teleosts. *International Journal of Comparative Psychology*, 20(4), 351-367.
- 1055 Mettke-Hofmann, C., Winkler, H., Hamel, P. B., & Greenberg, R. (2013). Migratory New  
1056 World blackbirds (icterids) are more neophobic than closely related resident icterids.  
1057 *PLoS One*, 8(2), e57565.
- 1058 Mettke-Hofmann, C., Winkler, H., & Leisler, B. (2002). The Significance of Ecological Factors  
1059 for Exploration and Neophobia in Parrots. *Ethology*, 108(3), 249-272.
- 1060 Moore, E. C., & Roberts, R. B. (*in preparation*). Heterospecific aggression diverges by  
1061 species rather than sex in Lake Malawi cichlid fishes.
- 1062 Parsons, K. J., Cooper, W. J., & Albertson, R. C. (2011). Modularity of the oral jaws is linked  
1063 to repeated changes in the craniofacial shape of african cichlids. *International journal*  
1064 *of evolutionary biology*, 2011, 641501-641501.
- 1065 Raff, E. C., & Raff, R. A. (2000). Dissociability, modularity, evolvability. *Evolution &*  
1066 *development*, 2(5), 235-237.
- 1067 Ramos, A., Berton, O., Mormède, P., & Chaouloff, F. (1997). A multiple-test study of anxiety-  
1068 related behaviors in six inbred rat strains. *Behavioral Brain Research*, 85(1), 57-69.
- 1069 Réale, D., Reader, S. M., Sol, D., McDougall, P. T., & Dingemanse, N. J. (2007). Integrating  
1070 animal temperament within ecology and evolution. *Biological Reviews*, 82(2), 291-  
1071 318.
- 1072 Ribbink, A. J., Marsh, B. A., Marsh, A. C., Ribbink, A. C., & Sharp, B. J. (1983). A preliminary  
1073 survey of the cichlid fishes of rocky habitats in Lake Malawi. *South African Journal of*  
1074 *Zoology*, 18(3), 149-310.
- 1075 Roberts, R. B., Ser, J. R., & Kocher, T. D. (2009). Sexual conflict resolved by invasion of a  
1076 novel sex determiner in Lake Malawi cichlid fishes. *Science*, 326(5955), 998-1001.
- 1077 Rupp, M. F., & Hulse, C. D. (2014). Influence of substrate orientation on feeding kinematics  
1078 and performance of algae-grazing Lake Malawi cichlid fishes. *J Exp Biol*, 217(Pt 17),  
1079 3057-3066.
- 1080 Ser, J. R., Roberts, R. B., & Kocher, T. D. (2010). Multiple interacting loci control sex  
1081 determination in lake Malawi cichlid fish. *Evolution*, 64(2), 486-501.
- 1082 Smith, B. R., & Blumstein, D. T. (2008). Fitness consequences of personality: a meta-  
1083 analysis. *Behavioral Ecology*, 19(2), 448-455.
- 1084 Stewart, A., Cachat, J., Wong, K., Gaikwad, S., Gilder, T., DiLeo, J., et al. (2010). Homebase  
1085 behavior of zebrafish in novelty-based paradigms. *Behavioral Processes*, 85(2), 198-  
1086 203.
- 1087 Stewart, A., Cachat, J. M., Wong, K., Wu, N., Grossman, L., Suci, C., et al. (2011).  
1088 Phenotyping of Zebrafish Homebase Behaviors in Novelty-Based Tests. In A. V.

- 1089 Kalueff & J. M. Cachat (Eds.), *Zebrafish Neurobehavioral Protocols* (pp. 143-155).  
1090 Totowa, NJ: Humana Press.
- 1091 Stewart, A., Gaikwad, S., Kyzar, E., Green, J., Roth, A., & Kalueff, A. V. (2012). Modeling  
1092 anxiety using adult zebrafish: A conceptual review. *Neuropharmacology*, 62(1), 135-  
1093 143.
- 1094 Stone, E. A., & Ayroles, J. F. (2009). Modulated modularity clustering as an exploratory tool  
1095 for functional genomic inference. *PLoS Genet*, 5(5), e1000479.
- 1096 Sylvester, J. B., Rich, C. A., Loh, Y. H., van Staaden, M. J., Fraser, G. J., & Streelman, J. T.  
1097 (2010). Brain diversity evolves via differences in patterning. *Proc Natl Acad Sci U S*  
1098 *A*, 107(21), 9718-9723.
- 1099 Wagner, G. P., Pavlicev, M., & Cheverud, J. M. (2007). The road to modularity. *Nature*  
1100 *Reviews Genetics*, 8(12), 921.
- 1101 Wong, R. Y., Perrin, F., Oxendine, S. E., Kezios, Z. D., Sawyer, S., Zhou, L., et al. (2012).  
1102 Comparing behavioral responses across multiple assays of stress and anxiety in  
1103 zebrafish (*Danio rerio*). *Behavior*, 149(10-12), 1205-1240.
- 1104 York, R. A., & Fernald, R. D. (2017). The Repeated Evolution of Behavior. [Focused  
1105 Review]. *Frontiers in Ecology and Evolution*, 4(143).
- 1106 York, R. A., Patil, C., Abdilleh, K., Johnson, Z. V., Conte, M. A., Genner, M. J., et al. (2018).  
1107 Behavior-dependent cis regulation reveals genes and pathways associated with  
1108 bower building in cichlid fishes. *Proc Natl Acad Sci U S A*, 115(47), E11081-E11090.
- 1109 York, R. A., Patil, C., Hulsey, C. D., Anoruo, O., Streelman, J. T., & Fernald, R. D. (2015).  
1110 Evolution of bower building in Lake Malawi cichlid fish: phylogeny, morphology, and  
1111 behavior. [Original Research]. *Frontiers in Ecology and Evolution*, 3(18).
- 1112 Yoshida, M., Nagamine, M., & Uematsu, K. (2005). Comparison of behavioral responses to a  
1113 novel environment between three teleosts, bluegill *Lepomis macrochirus*, crucian  
1114 carp *Carassius langsdorfii*, and goldfish *Carassius auratus*. [journal article]. *Fisheries*  
1115 *Science*, 71(2), 314-319.
- 1116
- 1117
- 1118
- 1119
- 1120
- 1121
- 1122
- 1123
- 1124
- 1125
- 1126
- 1127
- 1128
- 1129
- 1130
- .....

| Species                              | Microhabitat | Rad | Inst | N  | Bottom time (seconds) | Top time (seconds) | S.E.  | P <sub>top vs. bottom</sub> |
|--------------------------------------|--------------|-----|------|----|-----------------------|--------------------|-------|-----------------------------|
| <i>Metriaclima zebra</i>             | Rock         | Mbu | 1    | 5  | 332.46                | 27.54              | 13.15 | 2.05x10 <sup>-4</sup> ***   |
| <i>Labeothropheus fueleborni</i>     | Rock         | Mbu | 1    | 12 | 310.40                | 49.60              | 10.11 | 3.50x10 <sup>-8</sup> ***   |
| <i>Petrotilapia sp. 'chitimba'</i>   | Rock         | Mbu | 1    | 12 | 306.82                | 53.18              | 12.66 | 4.71x10 <sup>-7</sup> ***   |
| <i>Cynotilapia zebroides 'Cobue'</i> | Rock         | Mbu | 1    | 13 | 348.23                | 11.77              | 4.99  | 1.32x10 <sup>-12</sup> ***  |
| <i>Copadichromis virginalis</i>      | Sand         | B/U | 1    | 18 | 316.60                | 43.40              | 11.29 | 5.75x10 <sup>-10</sup> ***  |
| <i>Mchenga conophoros</i>            | Sand         | B/U | 1    | 18 | 229.88                | 130.12             | 23.35 | 0.0421 *                    |
| <i>Mylochromis anaphyrmus</i>        | Sand         | B/U | 1    | 14 | 295.95                | 64.05              | 15.30 | 2.70x10 <sup>-6</sup> ***   |
| <i>Tramitichromis intermedius</i>    | Sand         | B/U | 1    | 18 | 346.99                | 13.01              | 4.46  | 5.47x10 <sup>-18</sup> ***  |

1132

1133 **Supplementary Table 1.** Novel tank place bias between bottom and top regions by species.

1134 Each row corresponds to the species labeled in the left column. The following are presented  
 1135 for each species: microhabitat designation, evolutionary radiation (mbuna, Mbu;  
 1136 shallow/deep benthic and Utaka, B/U), test site (Inst.; INSTITUTION 1 vs. INSTITUTION 2),  
 1137 sample size, mean time in bottom zone, mean time in top zone, standard error for time spent  
 1138 in both zones, and two-tailed paired t-test p-values for the difference in time spent between  
 1139 the two zones.

1140

1141

1142

1143

1144

1145

1146

1147

1148

1149

1150

1151

1152



| Species                              | Microhabitat | Rad | Inst | N  | Dark time (seconds) | Light time (seconds) | S.E.  | P <sub>light vs. dark</sub> |
|--------------------------------------|--------------|-----|------|----|---------------------|----------------------|-------|-----------------------------|
| <i>Metriaclima zebra</i>             | Rock         | Mbu | 1    | 5  | 312.67              | 47.33                | 17.67 | 0.0011 **                   |
| <i>Labeothropheus fueleborni</i>     | Rock         | Mbu | 1    | 2  | 272.91              | 87.09                | 16.19 | 0.078                       |
| <i>Petrotilapia sp. 'chitimba'</i>   | Rock         | Mbu | 1    | 13 | 297.82              | 62.18                | 8.34  | 4.87x10 <sup>-9</sup> ***   |
| <i>Cynotilapia zebroides 'Cobue'</i> | Rock         | Mbu | 1    | 12 | 344.07              | 15.93                | 8.15  | 3.12x10 <sup>-10</sup> ***  |
| <i>Copadichromis virginalis</i>      | Sand         | B/U | 1    | 12 | 203.77              | 156.23               | 32.73 | 0.46                        |
| <i>Mchenga conophoros</i>            | Sand         | B/U | 1    | 12 | 275.42              | 84.58                | 27.02 | 0.0036 **                   |
| <i>Mylochromis anaphyrmus</i>        | Sand         | B/U | 1    | 4  | 311.83              | 48.17                | 38.02 | 0.028 *                     |
| <i>Tramitichromis intermedius</i>    | Sand         | B/U | 1    | 11 | 325.74              | 34.26                | 11.07 | 7.74x10 <sup>-8</sup> ***   |

1153

1154 **Supplementary Table 2.** Place bias between light and dark halves of the light-dark test by  
 1155 species. Each row corresponds to the species labeled in the left column. The following are  
 1156 presented for each species: sample size, microhabitat designation, evolutionary radiation  
 1157 (mbuna, Mbu; shallow/deep benthic and Utaka, B/U), mean time in dark zone, mean time in  
 1158 light zone, standard error for time spent in both zones, and two-tailed paired p-value for the  
 1159 difference in time spent between the two zones.

1160

1161

1162

1163

1164

1165

1166

1167

1168

1169

1170

1171

1172

1173

| Species                                          | Microhab     | Rad | Inst | N  | MD | LG | Center time (seconds) | Periphery time (seconds) | S.E.  | P <sub>center vs. periphery</sub> |
|--------------------------------------------------|--------------|-----|------|----|----|----|-----------------------|--------------------------|-------|-----------------------------------|
| <i>Metriaclima mbenjii</i>                       | Rock         | Mbu | 2    | 39 | 9  | 30 | 62.06                 | 257.94                   | 10.13 | 7.89x10 <sup>-12</sup> ***        |
| <i>Metriaclima zebra</i>                         | Rock         | Mbu | 1    | 9  | 9  | 0  | 17.32                 | 302.68                   | 3.31  | 5.83x10 <sup>-11</sup> ***        |
| <i>Labeotropheus fuelleborni</i>                 | Rock         | Mbu | 1,2  | 23 | 15 | 8  | 9.27                  | 310.73                   | 2.13  | 1.10x10 <sup>-27</sup> ***        |
| <i>Labeotropheus trewasasae</i>                  | Rock         | Mbu | 2    | 11 | 11 | 0  | 28.09                 | 291.91                   | 2.01  | 1.04x10 <sup>-14</sup> ***        |
| <i>Petrotilapia sp. 'chitimba'</i>               | Rock         | Mbu | 1    | 14 | 12 | 2  | 2.56                  | 317.44                   | 1.09  | 1.91x10 <sup>-22</sup> ***        |
| <i>Labidochromis caeruleus</i>                   | Rock         | Mbu | 2    | 10 | 10 | 0  | 17.17                 | 302.83                   | 0.80  | 1.75x10 <sup>-17</sup> ***        |
| <i>Labidochromis sp. 'hong'i'</i>                | Rock         | Mbu | 2    | 4  | 4  | 0  | 19.37                 | 300.63                   | 2.50  | 8.08x10 <sup>-6</sup> ***         |
| <i>Cynotilapia zebroides</i>                     | Rock         | Mbu | 2    | 21 | 0  | 21 | 26.22                 | 293.78                   | 4.94  | 1.92x10 <sup>-17</sup> ***        |
| <i>Cynotilapia zebroides 'Cobue'</i>             | Rock         | Mbu | 1    | 18 | 9  | 9  | 4.90                  | 315.10                   | 3.30  | 1.20x10 <sup>-19</sup> ***        |
| <i>Tropheops sp. 'Boadzulu'</i>                  | Intermediate | Mbu | 2    | 29 | 0  | 29 | 20.29                 | 299.71                   | 2.48  | 1.37x10 <sup>-30</sup> ***        |
| <i>Metriaclima (Pseudotropheus) aurora</i>       | Intermediate | Mbu | 2    | 55 | 48 | 7  | 29.94                 | 290.06                   | 2.20  | 5.78x10 <sup>-51</sup> ***        |
| <i>Aulonocara baenschi</i>                       | Intermediate | B/U | 2    | 9  | 9  | 0  | 73.77                 | 246.23                   | 28.32 | 0.0121 *                          |
| <i>Aulonocara koningsi</i>                       | Intermediate | B/U | 2    | 18 | 10 | 8  | 47.91                 | 272.09                   | 10.50 | 3.87x10 <sup>-9</sup> ***         |
| <i>Aulonocara jacobfreibergi</i>                 | Intermediate | B/U | 2    | 4  | 0  | 4  | 36.52                 | 283.48                   | 13.98 | 0.00201 **                        |
| <i>Copadichromis trewasasae</i>                  | Intermediate | B/U | 2    | 11 | 11 | 0  | 29.75                 | 290.25                   | 2.23  | 3.24x10 <sup>-14</sup> ***        |
| <i>Copadichromis virginalis</i>                  | Sand         | B/U | 1    | 15 | 0  | 15 | 16.99                 | 303.01                   | 8.23  | 4.52x10 <sup>-11</sup> ***        |
| <i>Mchenga conophoros</i>                        | Sand         | B/U | 1    | 22 | 10 | 12 | 30.84                 | 289.16                   | 14.11 | 5.99x10 <sup>-9</sup> ***         |
| <i>Tramitichromis intermedius</i>                | Sand         | B/U | 1    | 19 | 9  | 10 | 35.07                 | 284.93                   | 8.03  | 4.39x10 <sup>-12</sup> ***        |
| <i>Metriaclima (Pseudotropheus) livingstonii</i> | Sand         | Mbu | 2    | 10 | 0  | 10 | 56.48                 | 263.52                   | 30.74 | 0.00622 ***                       |

1174

1175 **Supplementary Table 3.** Place bias between central and peripheral regions of the open  
 1176 field test by species. Each row corresponds to the species labeled in the left column. The  
 1177 following are presented for each species: sample size, microhabitat designation, estimate for  
 1178 mean time in center, estimate for mean time in periphery, standard error for time spent in  
 1179 center and periphery, and two-tailed paired p-value for the difference in time spent in central  
 1180 versus peripheral regions.

1181

1182



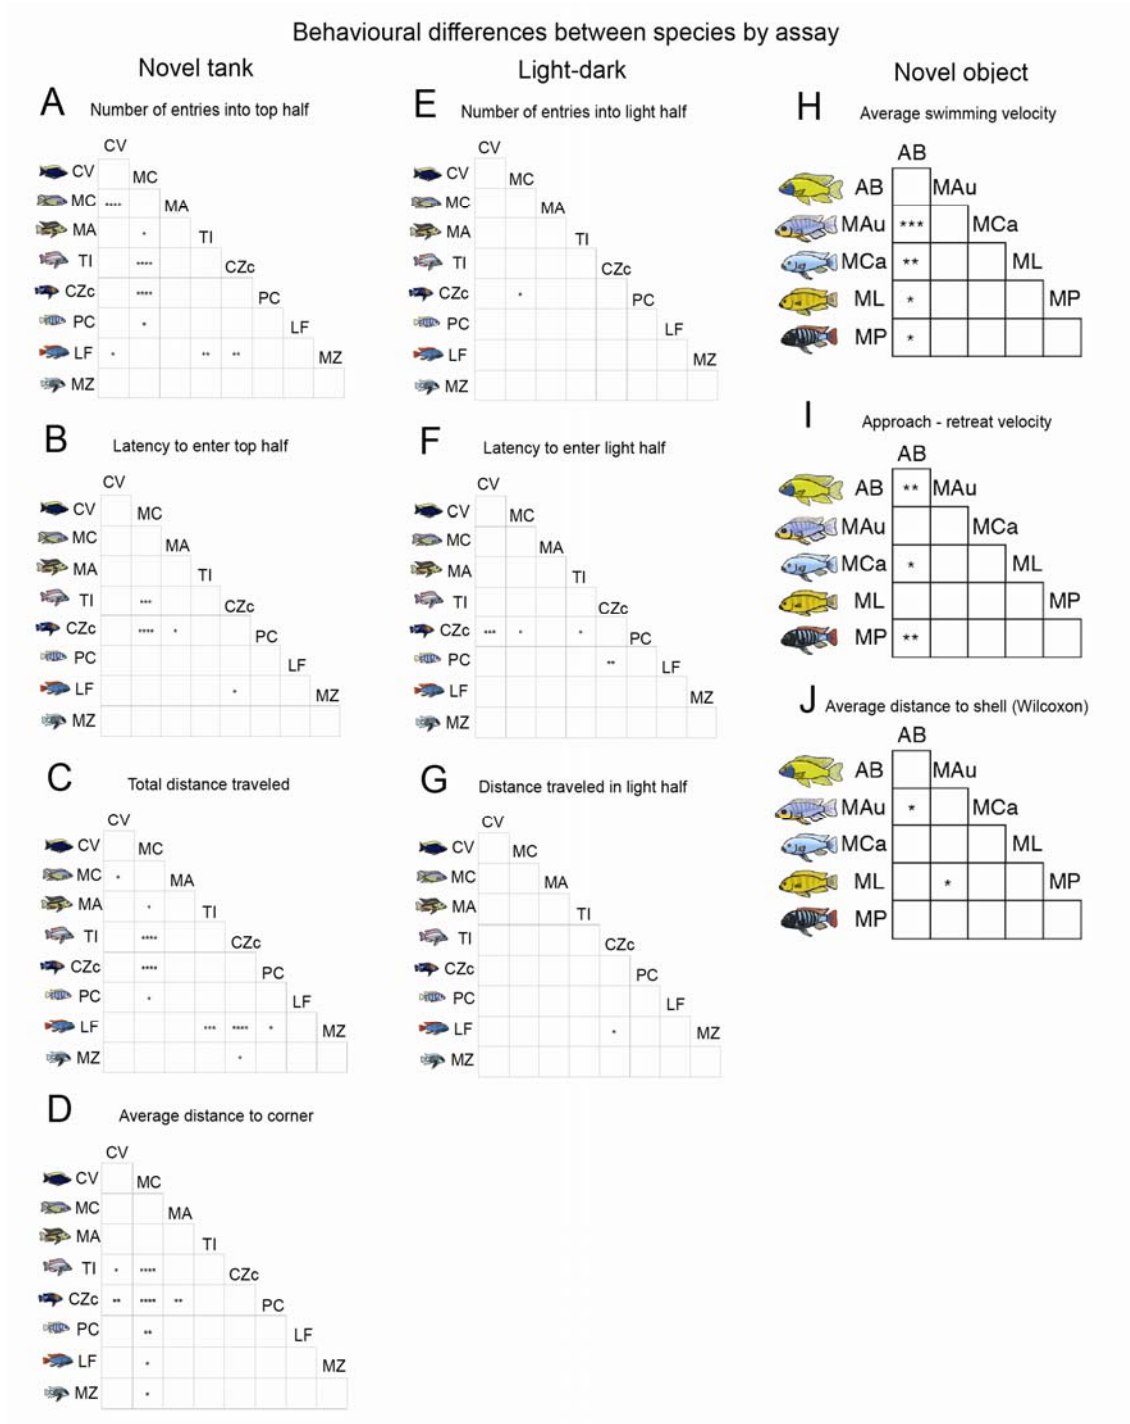

1201

1202 **Supplementary Figure 2.** Pairwise species differences in behavior across assays, including  
 1203 the novel tank (A-D), light-dark (E-G), and novel object (H-J) tests. Asterisks indicate levels  
 1204 of significance for post-hoc Tukey's HSD tests of the pairwise differences between species (\*  
 1205  $p < 0.05$ , \*\*  $p < 0.005$ , \*\*\*  $p < 0.0005$ , \*\*\*\*  $p < 5 \times 10^{-5}$ ).

1206

1207

1208

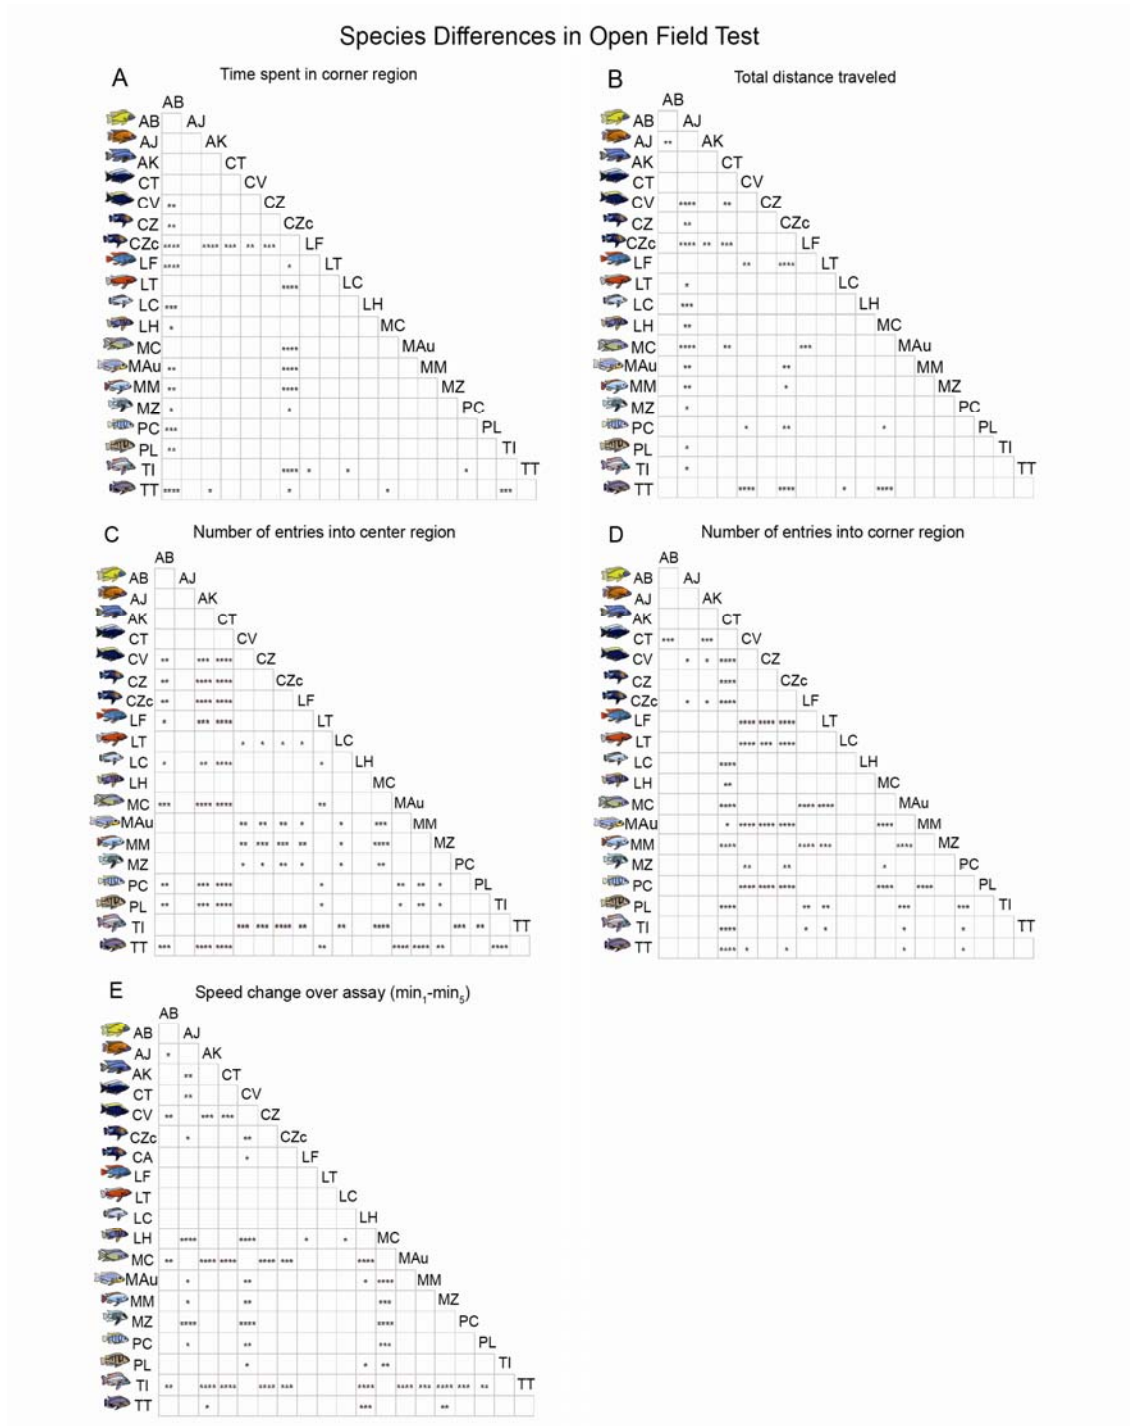

1209

1210 **Supplementary Figure 3.** Pairwise species differences in open field behaviors (A-E).

1211 Asterisks indicate levels of significance for post-hoc Tukey's HSD tests of the difference

1212 between species (\*  $p < 0.05$ , \*\*  $p < 0.005$ , \*\*\*  $p < 0.0005$ , \*\*\*\*  $p < 5 \times 10^{-5}$ ).

1213

1214

1215

| Species                                    | Institution | N  | Age (days) | Novel tank | Light-dark | Resident intruder | Novel object | Open field |
|--------------------------------------------|-------------|----|------------|------------|------------|-------------------|--------------|------------|
| <i>Copadichromis virginalis</i>            | 1           | 11 | 90-180     | X          | X          |                   |              |            |
| <i>Cynotilapia zebroides</i> 'Cobue'       | 1           | 11 | 90-180     | X          | X          |                   |              |            |
| <i>Labeotropheus fuelleborni</i>           | 1           | 2  | 90-180     | X          | X          |                   |              |            |
| <i>Mchenga conophoros</i>                  | 1           | 12 | 90-180     | X          | X          |                   |              |            |
| <i>Metriaclima zebra</i>                   | 1           | 5  | 90-180     | X          | X          |                   |              |            |
| <i>Mylochromis anaphyrmus</i>              | 1           | 4  | 90-180     | X          | X          |                   |              |            |
| <i>Petrotilapia sp.</i> 'chitimba'         | 1           | 12 | 90-180     | X          | X          |                   |              |            |
| <i>Tramitichromis intermedius</i>          | 1           | 10 | 90-180     | X          | X          |                   |              |            |
| <i>Aulonocara baenschi</i>                 | 2           | 14 | >180       |            |            | X                 | X            | X          |
| <i>Metriaclima (Pseudotropheus) aurora</i> | 2           | 14 | >180       |            |            | X                 | X            | X          |
| <i>Metriaclima callainos</i>               | 2           | 14 | >180       |            |            | X                 | X            | X          |
| <i>Metriaclima lombardoi</i>               | 2           | 14 | >180       |            |            | X                 | X            | X          |
| <i>Metriaclima pyrrsonotos</i>             | 2           | 14 | >180       |            |            | X                 | X            | X          |

1216

1217 **Supplementary Table 4.** Samples analyzed for Modularity Modular Clustering analysis,  
 1218 organized by species, institution, sample size, age, and assay. For each species, each "X"  
 1219 indicates the assays in which all subjects sampled were tested. Two independent datasets  
 1220 were analyzed, the first dataset is represented by the first eight species listed, and the  
 1221 second dataset is represented by the last five species listed.

1222

1223

1224

1225

1226

1227

1228

1229

| Species                                          | Microhab | Rad | Inst | NT   | LD       | NO | OF        | RI    | Total |
|--------------------------------------------------|----------|-----|------|------|----------|----|-----------|-------|-------|
| <i>Metriaclima mbenjii</i>                       | Rock     | Mbu | 2    | 0    | 0        | 0  | 39        | 0     | 39    |
| <i>Metriaclima zebra</i>                         | Rock     | Mbu | 1    | 5    | (5)      | 0  | 9         | 0     | 14    |
| <i>Labeotropheus fuelleborni</i>                 | Rock     | Mbu | 1    | 12   | (2)      | 0  | 16        | 0     | 28    |
| ( <i>Labeotropheus fuelleborni</i> )             | Rock     | Mbu | 2    | 0    | 0        | 0  | 7         | 0     | 7     |
| <i>Labeotropheus trewavasae</i>                  | Rock     | Mbu | 2    | 0    | 0        | 0  | 11        | 0     | 11    |
| <i>Petrotilapia</i> sp. 'chitimba'               | Rock     | Mbu | 1    | (12) | 13       | 0  | 14        | 0     | 27    |
| <i>Labidochromis caeruleus</i>                   | Rock     | Mbu | 2    | 0    | 0        | 0  | 10        | 0     | 10    |
| <i>Labidochromis</i> sp. 'hongii'                | Rock     | Mbu | 2    | 0    | 0        | 0  | 4         | 0     | 4     |
| <i>Cynotilapia zebroides</i>                     | Rock     | Mbu | 2    | 0    | 0        | 0  | 21        | 0     | 21    |
| <i>Cynotilapia zebroides</i> 'Cobue'             | Rock     | Mbu | 1    | 13   | (11) + 1 | 0  | 18        | 0     | 32    |
| <i>Tropheops</i> sp. 'Boadzulu'                  | Inter    | Mbu | 2    | 0    | 0        | 0  | 29        | 0     | 29    |
| <i>Metriaclima (Pseudotropheus) aurora</i>       | Inter    | Mbu | 2    | 0    | 0        | 14 | 55+(14*)  | (14*) | 69    |
| <i>Aulonocara baenschi</i>                       | Inter    | B/U | 2    | 0    | 0        | 14 | 9+(14*)   | (14*) | 23    |
| <i>Aulonocara koningsi</i>                       | Inter    | B/U | 2    | 0    | 0        | 0  | 18        | 0     | 18    |
| <i>Aulonocara jacobfreibergeri</i>               | Inter    | B/U | 2    | 0    | 0        | 0  | 4         | 0     | 4     |
| <i>Copadichromis trewavasae</i>                  | Inter    | B/U | 2    | 0    | 0        | 0  | 11        | 0     | 11    |
| <i>Copadichromis virginalis</i>                  | Sand     | B/U | 1    | 18   | (11) + 1 | 0  | 15        | 0     | 34    |
| <i>Mchenga conophoros</i>                        | Sand     | B/U | 1    | 18   | (12)     | 0  | 22        | 0     | 40    |
| <i>Mylochromis anaphyrmus</i>                    | Sand     | B/U | 1    | 14   | (4)      | 0  | 0         | 0     | 14    |
| <i>Tramitichromis intermedius</i>                | Sand     | B/U | 1    | 18   | (10) + 1 | 0  | 19        | 0     | 38    |
| <i>Metriaclima (Pseudotropheus) livingstonii</i> | Sand     | Mbu | 2    | 0    | 0        | 0  | 10        | 0     | 10    |
| <i>Metriaclima callainos</i>                     | Rock     | Mbu | 2    | 0    | 0        | 14 | (14*)     | (14*) | 14    |
| <i>Metriaclima lombardoi</i>                     | Rock     | Mbu | 2    | 0    | 0        | 14 | (14*)     | (14*) | 14    |
| <i>Metriaclima pyrsonotos</i>                    | Rock     | Mbu | 2    | 0    | 0        | 14 | (14*)     | (14*) | 14    |
| <b>TOTALS</b>                                    |          |     |      | 110  | (67) + 4 | 70 | 341+(70*) | (70*) | 525   |

1230

1231 **Supplementary Table 5.** Total subject counts by species, microhabitat (Rock, Sand,  
1232 Intermediate=Inter), evolutionary radiation (Mbuna=Mbu, shallow/deep benthic and  
1233 utaka=B/U), institution (INSTITUTION 1 vs. INSTITUTION 2), and assay (novel tank=NT,  
1234 light-dark=LD, novel object=NO, open field=OF, resident intruder=RI). Subjects that were  
1235 tracked in multiple assays are indicated by parentheses, and are only counted once.  
1236 Numbers that are italicized and marked by asterisks within parentheses indicate individuals  
1237 that were subjected the novel object test as well as a different open field test and a resident  
1238 intruder test that are part of another study (Moore & Roberts, *in preparation*); because these  
1239 subjects were tracked across multiple assays, their behavior across all three assays was  
1240 analyzed in MMC. One species, *Labeotropheus fuelleborni*, was housed at both institutions,  
1241 and is represented in two separate rows to show information about subjects at each  
1242 institution (indicated as a duplicate species by parentheses).
